# Supplementary material for: The origin of regio- and stereoselectivity in the 1,3-dipolar cycloaddition of nitrile oxides with C1-substituted 7-oxabenzonorbornadienes, a DFT study
Source: Royal Society of Chemistry journal article supplement (doi:10.1039/c5ra04254b), 2015-01-01
Supplement: c5ra04254b1.pdf [file c5ra04254b1.pdf]

Supporting Information for:  
**The origin of regio- and stereoselectivity in 1,3-dipolar cycloaddition  
of nitrile oxides with C<sub>1</sub>-substituted 7-oxabenzonorbornadienes, A  
DFT study**

M. Bakavoli, M. Gholizadeh, H. Eshghi, M. Izadyar and J. Tajabadi\*

Department of Chemistry, Faculty of Sciences, Ferdowsi University of Mashhad, Mashhad 91775-1436, Iran.  
Corresponding author: Javad Tajabadi (e-mail: javad.tajabadi@stu.um.ac.ir).  
Tel/Fax: +985138795457

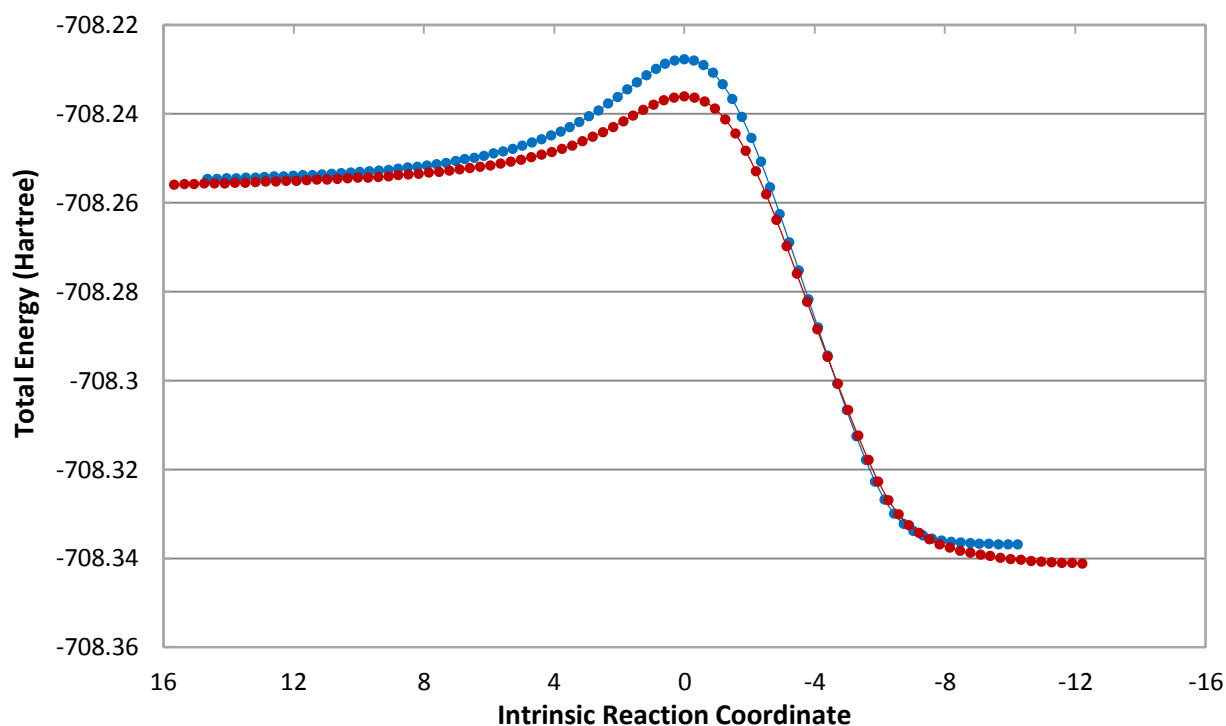

**Figure S1.** B3LYP/6-31G(d) IRC plot for the reaction pathways leading to **3X (ba)** and **3N (ba)**.

**Table S1.** B3LYP/6-31G(d) HOMO and LUMO energies, electronic chemical potential,  $\mu$ , chemical hardness,  $\eta$ , electrophilicity,  $\omega$ , and nucleophilicity,  $N^a$ , indices, in eV, of the reactants

| Reactants | $\epsilon_{\text{HOMO}}$ | $\epsilon_{\text{LUMO}}$ | $\mu$ | $\eta$ | $\omega$ | $N^a$ |
|-----------|--------------------------|--------------------------|-------|--------|----------|-------|
| <b>1a</b> | -6.73                    | 0.94                     | -2.89 | 7.66   | 0.55     | 2.39  |
| <b>1b</b> | -6.34                    | -1.31                    | -3.82 | 5.02   | 1.46     | 2.78  |
| <b>2a</b> | -5.98                    | -0.53                    | -3.25 | 5.45   | 0.97     | 3.15  |
| <b>2b</b> | -5.92                    | -0.50                    | -3.21 | 5.41   | 0.95     | 3.20  |
| <b>2c</b> | -5.88                    | -0.46                    | -3.17 | 5.42   | 0.93     | 3.25  |
| <b>2d</b> | -6.17                    | -0.71                    | -3.44 | 5.45   | 1.08     | 2.95  |

<sup>a</sup> HOMO energy of tetracyanoethylene is -9.12 eV at the same level of theory.

**Table S2.** Electronic energies ( $E$ ), sum of electronic and zero-point energies ( $E_{zpv}$ ), sum of electronic and thermal enthalpies ( $H$ ), sum of electronic and thermal Gibbs energies ( $G$ ), in a. u., and entropies ( $S$ ), in Cal mol<sup>-1</sup> K<sup>-1</sup>, for the all species at B3LYP/6-31G(d) level of theory

|                  | $E$          | $E_{zpv}$    | $H$          | $G$          | $S$     |
|------------------|--------------|--------------|--------------|--------------|---------|
| <b>1a</b>        | -207.899238  | -207.849444  | -207.843747  | -207.875943  | 67.763  |
| <b>1b</b>        | -399.639891  | -399.536429  | -399.528207  | -399.569137  | 86.145  |
| <b>2a</b>        | -461.030900  | -460.878648  | -460.870557  | -460.910430  | 83.921  |
| <b>2b</b>        | -500.352421  | -500.172707  | -500.162984  | -500.206110  | 90.765  |
| <b>2c</b>        | -869.704174  | -869.450998  | -869.434677  | -869.493168  | 123.104 |
| <b>2d</b>        | -613.675175  | -613.486445  | -613.474545  | -613.523727  | 103.514 |
| <b>TSXA (aa)</b> | -668.913927  | -668.710857  | -668.697589  | -668.750151  | 110.625 |
| <b>TSNA (aa)</b> | -668.906136  | -668.703145  | -668.690044  | -668.741746  | 108.817 |
| <b>TSXA (ab)</b> | -860.654676  | -860.398104  | -860.382085  | -860.442356  | 126.851 |
| <b>TSNA (ab)</b> | -860.646311  | -860.389959  | -860.373992  | -860.434145  | 126.602 |
| <b>TSXA (ba)</b> | -708.236044  | -708.005543  | -707.990646  | -708.046292  | 117.117 |
| <b>TSNA (ba)</b> | -708.227731  | -707.997293  | -707.982519  | -708.037498  | 115.714 |
| <b>TSXS (ba)</b> | -708.233609  | -708.002960  | -707.988103  | -708.043793  | 117.209 |
| <b>TSNS (ba)</b> | -708.227438  | -707.997034  | -707.982262  | -708.037206  | 115.639 |
| <b>TSXA (bb)</b> | -899.976701  | -899.692587  | -899.674954  | -899.738322  | 133.368 |
| <b>TSNA (bb)</b> | -899.967895  | -899.684111  | -899.666482  | -899.729532  | 132.701 |
| <b>TSXS (bb)</b> | -899.974207  | -899.690159  | -899.672529  | -899.735810  | 133.185 |
| <b>TSNS (bb)</b> | -899.967660  | -899.683867  | -899.666251  | -899.729290  | 132.676 |
| <b>TSXA (ca)</b> | -1077.587053 | -1077.282806 | -1077.261411 | -1077.331565 | 147.651 |
| <b>TSNA (ca)</b> | -1077.579236 | -1077.275547 | -1077.254044 | -1077.324590 | 148.476 |
| <b>TSXS (ca)</b> | -1077.580977 | -1077.276785 | -1077.255461 | -1077.325198 | 146.774 |
| <b>TSNS (ca)</b> | -1077.578618 | -1077.274710 | -1077.253334 | -1077.323344 | 147.348 |
| <b>TSXA (da)</b> | -821.559786  | -821.320107  | -821.303130  | -821.363898  | 127.898 |
| <b>TSNA (da)</b> | -821.548264  | -821.308902  | -821.291881  | -821.353601  | 129.900 |
| <b>TSXS (da)</b> | -821.559228  | -821.319476  | -821.302492  | -821.363571  | 128.551 |
| <b>TSNS (da)</b> | -821.554128  | -821.314294  | -821.297570  | -821.357319  | 125.752 |
| <b>3X (aa)</b>   | -669.019108  | -668.810311  | -668.798583  | -668.846941  | 101.778 |
| <b>3N (aa)</b>   | -669.015165  | -668.806292  | -668.794623  | -668.842800  | 101.397 |
| <b>3X (ab)</b>   | -860.758842  | -860.496637  | -860.481887  | -860.538313  | 118.758 |
| <b>3N (ab)</b>   | -860.755156  | -860.492838  | -860.478156  | -860.534347  | 118.262 |
| <b>3X (ba)</b>   | -708.341186  | -708.104813  | -708.091466  | -708.142923  | 108.299 |
| <b>3N (ba)</b>   | -708.336915  | -708.100648  | -708.087296  | -708.138737  | 108.267 |
| <b>4X (ba)</b>   | -708.338168  | -708.101612  | -708.088346  | -708.139567  | 107.804 |
| <b>4N (ba)</b>   | -708.336445  | -708.100120  | -708.086791  | -708.138137  | 108.066 |
| <b>3X (bb)</b>   | -900.080882  | -899.791072  | -899.774696  | -899.834194  | 125.223 |
| <b>3N (bb)</b>   | -900.076898  | -899.787161  | -899.770800  | -899.830308  | 125.246 |
| <b>4X (bb)</b>   | -900.077786  | -899.787856  | -899.771599  | -899.830583  | 124.142 |
| <b>4N (bb)</b>   | -900.075599  | -899.785804  | -899.769502  | -899.828787  | 124.776 |
| <b>3X (ca)</b>   | -1077.693936 | -1077.383921 | -1077.364067 | -1077.429989 | 138.745 |
| <b>3N (ca)</b>   | -1077.688238 | -1077.378527 | -1077.358519 | -1077.425280 | 140.512 |
| <b>4X (ca)</b>   | -1077.686545 | -1077.376317 | -1077.356579 | -1077.421885 | 137.449 |
| <b>4N (ca)</b>   | -1077.687100 | -1077.377102 | -1077.357296 | -1077.423433 | 139.197 |
| <b>3X (da)</b>   | -821.663883  | -821.418398  | -821.402941  | -821.459621  | 119.294 |
| <b>3N (da)</b>   | -821.656309  | -821.411047  | -821.395519  | -821.452766  | 120.487 |
| <b>4X (da)</b>   | -821.662018  | -821.416615  | -821.401089  | -821.458218  | 120.237 |
| <b>4N (da)</b>   | -821.659819  | -821.414413  | -821.398907  | -821.456054  | 120.276 |

**Table S3.** Single point energies ( $E$ ), enthalpies ( $H$ )<sup>a</sup> and Gibbs energies ( $G$ )<sup>a</sup> for reactants and TSs, at M05-2X(UF)/6-311++G(2d,2p)//B3LYP/6-31G(d), in a. u.

| Structure        | $E$          | $H$          | $G$          |
|------------------|--------------|--------------|--------------|
| <b>1a</b>        | -207.928534  | -207.873043  | -207.905239  |
| <b>1b</b>        | -399.706620  | -399.594936  | -399.635866  |
| <b>2a</b>        | -461.127487  | -460.967144  | -461.007017  |
| <b>2b</b>        | -500.455385  | -500.265947  | -500.309073  |
| <b>2c</b>        | -869.828503  | -869.559006  | -869.617497  |
| <b>2d</b>        | -613.804187  | -613.603557  | -613.652739  |
| <b>TSXA (aa)</b> | -669.038522  | -668.822184  | -668.874746  |
| <b>TSNA (aa)</b> | -669.032445  | -668.816353  | -668.868055  |
| <b>TSXA (ab)</b> | -860.817374  | -860.544783  | -860.605054  |
| <b>TSNA (ab)</b> | -860.810986  | -860.538666  | -860.598819  |
| <b>TSXA (ba)</b> | -708.367216  | -708.121818  | -708.177464  |
| <b>TSNA (ba)</b> | -708.360690  | -708.115478  | -708.170457  |
| <b>TSXS (ba)</b> | -708.364801  | -708.119295  | -708.174985  |
| <b>TSNS (ba)</b> | -708.360714  | -708.115538  | -708.170482  |
| <b>TSXA (bb)</b> | -900.145922  | -899.844175  | -899.907543  |
| <b>TSNA (bb)</b> | -900.139225  | -899.837812  | -899.900862  |
| <b>TSXS (bb)</b> | -900.144068  | -899.842389  | -899.905670  |
| <b>TSNS (bb)</b> | -900.139876  | -899.838467  | -899.901506  |
| <b>TSXA (ca)</b> | -1077.739312 | -1077.413670 | -1077.483824 |
| <b>TSNA (ca)</b> | -1077.733794 | -1077.408603 | -1077.479149 |
| <b>TSXS (ca)</b> | -1077.734576 | -1077.409061 | -1077.478798 |
| <b>TSNS (ca)</b> | -1077.733950 | -1077.408666 | -1077.478676 |
| <b>TSXA (da)</b> | -821.716868  | -821.460212  | -821.520980  |
| <b>TSNA (da)</b> | -821.706854  | -821.450471  | -821.512191  |
| <b>TSXS (da)</b> | -821.717392  | -821.460656  | -821.521735  |
| <b>TSNS (da)</b> | -821.713710  | -821.457152  | -821.516901  |

<sup>a</sup> Calculated as the sum of M05-2X(UF)/6-311++G(2d,2p) energies and the thermal corrections to enthalpies or Gibbs energies obtained from thermochemical calculations (298.15 K, 1 atm) at the B3LYP/6-31G(d) level.

**Table S4.** Some of dihedral angle values, in degree, at the optimized reactants and TSs

| Structures       | $\theta_1$ | $\theta_2$ | $\theta_3$ | $\theta_4$ | $\theta_5$ | $\theta_6$ |
|------------------|------------|------------|------------|------------|------------|------------|
| <b>2a</b>        | -174.7     | 174.7      | 151.5      | -151.5     | 30.4       | -30.4      |
| <b>2b</b>        | -174.9     | 174.6      | 152.0      | -151.5     | 30.5       | -30.4      |
| <b>2c</b>        | -175.0     | 174.2      | 153.0      | -151.5     | 34.8       | -30.2      |
| <b>2d</b>        | -174.7     | 174.0      | 152.0      | -151.7     | 27.5       | -30.8      |
| <b>TSXA (aa)</b> | -155.6     | 160.5      | 164.8      | -170.4     | 43.7       | -49.9      |
| <b>TSNA (aa)</b> | 153.9      | -162.1     | 128.6      | -119.9     | 8.9        | 0.1        |
| <b>TSXA (ab)</b> | -155.3     | 160.6      | 164.7      | -170.9     | 43.6       | -50.5      |
| <b>TSNA (ab)</b> | 153.4      | -162.5     | 128.8      | -119.2     | 9.2        | 0.7        |
| <b>TSXA (ba)</b> | -155.4     | 160.5      | 165.2      | -170.8     | 43.1       | -50.1      |
| <b>TSNA (ba)</b> | 153.7      | -162.2     | 129.4      | -119.9     | 9.1        | 0.2        |
| <b>TSXS (ba)</b> | -159.6     | 153.5      | 172.9      | -165.9     | 51.1       | -44.6      |
| <b>TSNS (ba)</b> | 161.7      | -154.0     | 120.8      | -128.5     | 0.4        | -8.7       |
| <b>TSXA (bb)</b> | -155.1     | 160.5      | 165.3      | -171.4     | 43.1       | -50.8      |
| <b>TSNA (bb)</b> | 153.3      | -162.7     | 129.7      | -119.2     | 9.4        | 0.7        |
| <b>TSXS (bb)</b> | -159.5     | 153.5      | 173.1      | -166.0     | 51.2       | -44.8      |
| <b>TSNS (bb)</b> | 161.9      | -153.3     | 119.9      | -128.4     | -0.4       | -8.7       |

|                  |        |        |       |        |      |       |
|------------------|--------|--------|-------|--------|------|-------|
| <b>TSXA (ca)</b> | -154.5 | 159.3  | 167.1 | -172.2 | 46.6 | -51.2 |
| <b>TSNA (ca)</b> | 153.3  | -162.9 | 130.2 | -119.5 | 13.5 | 0.8   |
| <b>TSXS (ca)</b> | -159.2 | 151.1  | 175.9 | -166.6 | 56.8 | -45.1 |
| <b>TSNS (ca)</b> | 160.6  | -154.9 | 121.6 | -127.4 | 6.0  | -7.4  |
| <b>TSXA (da)</b> | -154.7 | 160.6  | 164.2 | -171.3 | 39.9 | -51.0 |
| <b>TSNA (da)</b> | 152.4  | -162.8 | 130.0 | -118.9 | 7.2  | 1.0   |
| <b>TSXS (da)</b> | -160.7 | 152.7  | 172.4 | -164.9 | 48.2 | -44.1 |
| <b>TSNS (da)</b> | 162.2  | -152.7 | 119.6 | -128.8 | -3.8 | -9.3  |

**Cartesian coordinates for all optimized reactants, transition states and products at B3LYP/6-31G(d) level**

**1a**

|   |             |             |             |
|---|-------------|-------------|-------------|
| C | 0.43007600  | 0.00052300  | -0.00015300 |
| N | -0.73502300 | 0.00023400  | -0.00008400 |
| C | 1.89122900  | -0.00021700 | 0.00006800  |
| H | 2.28065500  | 1.00186000  | -0.21256600 |
| H | 2.27984300  | -0.31735700 | 0.97445100  |
| H | 2.27986900  | -0.68574700 | -0.76152200 |
| O | -1.95287900 | -0.00027900 | 0.00009300  |

**1b**

|   |             |             |             |
|---|-------------|-------------|-------------|
| C | 1.47288300  | -0.00008900 | -0.00004300 |
| N | 2.64140700  | 0.00000000  | -0.00001200 |
| O | 3.85693900  | 0.00003100  | 0.00004300  |
| C | 0.04520300  | -0.00004900 | -0.00002200 |
| C | -0.66434300 | 1.21651900  | -0.00001300 |
| C | -0.66442700 | -1.21655600 | -0.00001200 |
| C | -2.05632500 | 1.20931000  | 0.00001000  |
| H | -0.11669400 | 2.15357300  | -0.00002200 |
| C | -2.05641800 | -1.20924700 | 0.00001000  |
| H | -0.11685800 | -2.15365700 | -0.00002100 |
| C | -2.75594800 | 0.00005300  | 0.00002100  |
| H | -2.59659300 | 2.15173600  | 0.00001900  |
| H | -2.59674200 | -2.15164000 | 0.00001800  |
| H | -3.84222700 | 0.00009900  | 0.00003800  |

**2a**

|   |             |             |             |
|---|-------------|-------------|-------------|
| C | -2.58694600 | 0.69598800  | 0.16303500  |
| C | -2.58694700 | -0.69598500 | 0.16303400  |
| C | -1.38694200 | -1.41894100 | 0.00639900  |
| C | -0.21782300 | -0.70305200 | -0.15376500 |
| C | -0.21782200 | 0.70305100  | -0.15376500 |
| C | -1.38694000 | 1.41894200  | 0.00640000  |
| C | 1.26314500  | -1.07322000 | -0.34737400 |
| C | 1.99756300  | -0.66706900 | 0.94741000  |

|   |             |             |             |
|---|-------------|-------------|-------------|
| C | 1.99756700  | 0.66707100  | 0.94740500  |
| C | 1.26314600  | 1.07321800  | -0.34737800 |
| O | 1.66805100  | -0.00000300 | -1.22816500 |
| H | -3.52389900 | 1.23405700  | 0.28026000  |
| H | -3.52390100 | -1.23405300 | 0.28026000  |
| H | -1.39616800 | -2.50627000 | 0.00525100  |
| H | -1.39616500 | 2.50627100  | 0.00525100  |
| H | 1.49138700  | -2.04670000 | -0.78091600 |
| H | 2.34247200  | -1.35037500 | 1.71387300  |
| H | 2.34248000  | 1.35038100  | 1.71386400  |
| H | 1.49138800  | 2.04669600  | -0.78092400 |

## 2b

|   |             |             |             |
|---|-------------|-------------|-------------|
| C | -2.57405700 | 1.04461700  | 0.26323500  |
| C | -2.89908300 | -0.28331700 | 0.00290500  |
| C | -1.89215800 | -1.23657400 | -0.25241100 |
| C | -0.58006600 | -0.80889700 | -0.24315200 |
| C | -0.25060800 | 0.53214700  | 0.01932300  |
| C | -1.22987900 | 1.47012400  | 0.27808400  |
| C | 0.78278000  | -1.48706400 | -0.45904300 |
| C | 1.49467700  | -1.50328200 | 0.90899600  |
| C | 1.80174400  | -0.22955900 | 1.15658400  |
| C | 1.29185000  | 0.57683800  | -0.06350900 |
| O | 1.49017700  | -0.41160300 | -1.11213000 |
| H | -3.36523300 | 1.76510200  | 0.45359100  |
| H | -3.94162400 | -0.59022700 | -0.00807900 |
| H | -2.15420400 | -2.27193700 | -0.45694300 |
| H | -0.98649700 | 2.51038900  | 0.48063800  |
| H | 0.80688800  | -2.39760000 | -1.05786700 |
| H | 1.61324700  | -2.37138800 | 1.54627300  |
| H | 2.23816000  | 0.20655600  | 2.04769300  |
| C | 1.96495400  | 1.88861000  | -0.39206900 |
| H | 1.80226500  | 2.61537000  | 0.41163500  |
| H | 3.04267600  | 1.74191300  | -0.51233100 |
| H | 1.56197400  | 2.30278600  | -1.32122300 |

## 2c

|   |             |             |             |
|---|-------------|-------------|-------------|
| C | 2.66934400  | -1.95942600 | 0.32630400  |
| C | 3.60598800  | -1.03144100 | -0.11717000 |
| C | 3.21808400  | 0.28637400  | -0.43333700 |
| C | 1.88573500  | 0.61981700  | -0.30013000 |
| C | 0.93330100  | -0.31741500 | 0.14232200  |
| C | 1.31137400  | -1.60657900 | 0.46582000  |
| C | 1.07305900  | 1.90457000  | -0.51712000 |
| C | 0.63559500  | 2.38893000  | 0.87888700  |
| C | -0.26417500 | 1.49616800  | 1.29474300  |
| C | -0.40889400 | 0.45740900  | 0.15049400  |
| O | -0.15923900 | 1.33494700  | -1.00061500 |
| H | 2.98499900  | -2.97161800 | 0.56539800  |
| H | 4.64722300  | -1.32412300 | -0.22356800 |

|    |             |             |             |
|----|-------------|-------------|-------------|
| H  | 3.95491800  | 1.00875100  | -0.77680200 |
| H  | 0.59287300  | -2.34319900 | 0.81651100  |
| H  | 1.46923700  | 2.64378900  | -1.21401800 |
| H  | 1.06567900  | 3.22555700  | 1.41660600  |
| H  | -0.74813500 | 1.42869200  | 2.26222600  |
| Si | -2.08269700 | -0.43999000 | -0.09738300 |
| C  | -3.39913900 | 0.88597600  | -0.37113800 |
| H  | -3.13409300 | 1.51748200  | -1.22592100 |
| H  | -4.38020400 | 0.43752000  | -0.56941300 |
| H  | -3.50133500 | 1.53924600  | 0.50331800  |
| C  | -1.94711400 | -1.56622200 | -1.60740600 |
| H  | -1.18530300 | -2.34133200 | -1.46749100 |
| H  | -2.90075800 | -2.06546200 | -1.81794900 |
| H  | -1.66763300 | -0.98517200 | -2.49334700 |
| C  | -2.48433000 | -1.44447900 | 1.45975100  |
| H  | -3.46095700 | -1.93343200 | 1.35571600  |
| H  | -1.74484600 | -2.23030200 | 1.65319800  |
| H  | -2.53296600 | -0.80820100 | 2.35169200  |

## 2d

|   |             |             |             |
|---|-------------|-------------|-------------|
| C | 2.41129100  | -1.77817900 | 0.17143400  |
| C | 3.20390700  | -0.69963400 | -0.21289000 |
| C | 2.63640900  | 0.56838500  | -0.45095800 |
| C | 1.27011200  | 0.70153900  | -0.30349300 |
| C | 0.47508800  | -0.39095500 | 0.07859300  |
| C | 1.01839100  | -1.63359500 | 0.33031600  |
| C | 0.27314500  | 1.86467900  | -0.43378000 |
| C | -0.22523900 | 2.18902900  | 0.99049600  |
| C | -0.98086900 | 1.15046100  | 1.34771800  |
| C | -0.95655000 | 0.19304500  | 0.13348900  |
| O | -0.87019800 | 1.14572700  | -0.95345800 |
| H | 2.87099300  | -2.74622800 | 0.35136300  |
| H | 4.27554600  | -0.83538400 | -0.33158700 |
| H | 3.26380200  | 1.40580100  | -0.74636500 |
| H | 0.39849300  | -2.46997000 | 0.63997700  |
| H | 0.54210800  | 2.69690600  | -1.08375200 |
| H | 0.08026600  | 3.04408400  | 1.58109500  |
| H | -1.45641800 | 0.91886400  | 2.29191600  |
| C | -2.09785200 | -0.79597600 | 0.00382600  |
| O | -2.29242500 | -1.58232100 | 0.91330500  |
| C | -2.91831200 | -0.75619500 | -1.26164400 |
| H | -2.26980900 | -0.90480200 | -2.13296900 |
| H | -3.69027500 | -1.52701200 | -1.22448800 |
| H | -3.37085300 | 0.23486900  | -1.38259600 |

## TSXA (aa)

|   |             |             |             |
|---|-------------|-------------|-------------|
| C | -3.72761000 | 1.01462100  | -0.24890100 |
| C | -3.91311800 | -0.36505200 | -0.22859500 |
| C | -2.82768400 | -1.23686100 | -0.00966500 |
| C | -1.58043600 | -0.67980400 | 0.19242400  |

|   |             |             |             |
|---|-------------|-------------|-------------|
| C | -1.39259100 | 0.71424500  | 0.16918100  |
| C | -2.44938700 | 1.57481800  | -0.05156600 |
| C | -0.17139600 | -1.24139600 | 0.44534800  |
| C | 0.62900600  | -0.97275500 | -0.83509100 |
| C | 0.85190700  | 0.37763000  | -0.84599800 |
| C | 0.11457900  | 0.89038000  | 0.41375200  |
| O | 0.35263300  | -0.21009200 | 1.31469400  |
| O | 2.73374300  | -1.80566900 | -0.13343800 |
| N | 3.24353400  | -0.69119200 | -0.02954500 |
| C | 3.06496600  | 0.49169800  | -0.15769900 |
| C | 3.68812400  | 1.81700200  | 0.00523300  |
| H | -4.57902100 | 1.66963600  | -0.41405200 |
| H | -4.90798900 | -0.77639500 | -0.37759900 |
| H | -2.98145100 | -2.31314400 | 0.00722300  |
| H | -2.31442500 | 2.65384400  | -0.06723700 |
| H | 0.71164300  | -1.66615200 | -1.66021300 |
| H | 1.04246000  | 0.98202000  | -1.72573700 |
| H | 0.44326800  | 1.83272700  | 0.85315800  |
| H | 4.74335000  | 1.71482400  | 0.28095100  |
| H | 3.18222000  | 2.39139500  | 0.78980000  |
| H | 3.62858500  | 2.39292800  | -0.92480600 |
| H | -0.08254200 | -2.22439700 | 0.90474100  |

### **TSNA (aa)**

|   |             |             |             |
|---|-------------|-------------|-------------|
| C | -2.35775900 | -1.61253300 | -0.46151400 |
| C | -2.68635000 | -1.00850200 | 0.75156100  |
| C | -2.05082200 | 0.17588200  | 1.16516600  |
| C | -1.09742400 | 0.72546300  | 0.32873600  |
| C | -0.75601800 | 0.11086800  | -0.88690000 |
| C | -1.37515700 | -1.05553300 | -1.30011600 |
| C | -0.22831900 | 1.98534300  | 0.36939900  |
| C | 1.24577200  | 1.58065400  | 0.56538300  |
| C | 1.59456200  | 0.93205700  | -0.58982100 |
| C | 0.31790200  | 1.02665600  | -1.47456800 |
| O | -0.20710500 | 2.31307000  | -1.04853700 |
| C | 1.82700900  | -1.22007200 | 0.13127500  |
| N | 1.53703300  | -1.05564300 | 1.29193100  |
| O | 1.19695500  | -0.20170100 | 2.11355700  |
| C | 2.20370400  | -2.25899100 | -0.84494100 |
| H | -2.87311400 | -2.51909100 | -0.76797300 |
| H | -3.45145800 | -1.45298100 | 1.38252000  |
| H | -2.31284400 | 0.64032500  | 2.11206900  |
| H | -1.13116800 | -1.52565300 | -2.25052900 |
| H | 1.89139300  | 1.97714300  | 1.33441400  |
| H | 2.59386600  | 0.85095000  | -1.00077400 |
| H | 0.46765600  | 1.00564300  | -2.55420500 |
| H | 2.43438900  | -3.19984000 | -0.33390700 |
| H | 3.08495400  | -1.95247700 | -1.41877700 |
| H | 1.38401400  | -2.43956100 | -1.54975000 |
| H | -0.58830400 | 2.82633200  | 0.96126900  |

**TSXA (ab)**

|   |             |             |             |
|---|-------------|-------------|-------------|
| C | -4.31352400 | -2.06107200 | 0.04992100  |
| C | -5.01793300 | -0.86136000 | -0.00523800 |
| C | -4.34334400 | 0.36609500  | -0.16111400 |
| C | -2.96674700 | 0.33915600  | -0.26674500 |
| C | -2.25470700 | -0.87284600 | -0.20857000 |
| C | -2.90767900 | -2.07881900 | -0.04861900 |
| C | -1.87166400 | 1.40678800  | -0.42830300 |
| C | -1.12372400 | 1.45353500  | 0.91000200  |
| C | -0.39944300 | 0.29315900  | 0.95964100  |
| C | -0.78379500 | -0.44869800 | -0.34249100 |
| O | -0.92665800 | 0.67199000  | -1.23969100 |
| O | 0.52908100  | 3.02915700  | 0.31955200  |
| N | 1.44268500  | 2.21284200  | 0.25980000  |
| C | 1.73511000  | 1.04684000  | 0.39650300  |
| H | -4.85348200 | -2.99714000 | 0.16579100  |
| H | -6.10227000 | -0.87028000 | 0.06746200  |
| H | -4.90116200 | 1.29841200  | -0.20531200 |
| H | -2.36586800 | -3.02077800 | -0.00633400 |
| H | -1.37465500 | 2.11372300  | 1.72857400  |
| H | -0.06099000 | -0.19710700 | 1.86493400  |
| H | -0.07950200 | -1.17949000 | -0.73928700 |
| H | -2.13863200 | 2.35317600  | -0.89568400 |
| C | 2.81571000  | 0.11682300  | 0.18471700  |
| C | 3.87006500  | 0.43811200  | -0.69473600 |
| C | 2.82734500  | -1.12529800 | 0.84218000  |
| C | 4.91023900  | -0.46323800 | -0.89562300 |
| H | 3.85882100  | 1.39408700  | -1.20832700 |
| C | 3.87027800  | -2.02390600 | 0.62765300  |
| H | 2.02024000  | -1.37840800 | 1.52174100  |
| C | 4.91467900  | -1.69730900 | -0.23880400 |
| H | 5.71921500  | -0.20322800 | -1.57274300 |
| H | 3.86777800  | -2.98044400 | 1.14277800  |
| H | 5.72713500  | -2.39936900 | -0.40333000 |

**TSNA (ab)**

|   |             |             |             |
|---|-------------|-------------|-------------|
| C | 1.31628400  | 2.76382500  | -0.64482400 |
| C | 2.35684100  | 2.68103900  | 0.28024300  |
| C | 2.94853100  | 1.44471600  | 0.59352600  |
| C | 2.47442300  | 0.31875500  | -0.05375500 |
| C | 1.42326700  | 0.40077700  | -0.98063100 |
| C | 0.82862900  | 1.61166000  | -1.28678800 |
| C | 2.84761000  | -1.16522500 | -0.04138800 |
| C | 1.70714600  | -1.97202400 | 0.61199900  |
| C | 0.65476800  | -1.87760700 | -0.26003800 |
| C | 1.22454200  | -1.04326700 | -1.44392700 |
| O | 2.60699700  | -1.49044900 | -1.43913000 |
| C | -0.83335900 | -0.58144200 | 0.91126600  |
| N | -0.15270000 | -0.39061900 | 1.89787800  |



|   |             |             |             |
|---|-------------|-------------|-------------|
| O | 0.93689300  | -0.63986600 | 2.40722200  |
| H | 0.87954000  | 3.73149000  | -0.87741100 |
| H | 2.72073800  | 3.58508600  | 0.76131300  |
| H | 3.75627500  | 1.38731300  | 1.31839300  |
| H | 0.01376100  | 1.68270100  | -2.00302100 |
| H | 1.83884400  | -2.66440200 | 1.43009200  |
| H | -0.14691900 | -2.59798100 | -0.36793800 |
| H | 0.76859000  | -1.20313400 | -2.42130700 |
| H | 3.86290700  | -1.42843900 | 0.25363800  |
| C | -2.14338700 | -0.27212200 | 0.39204500  |
| C | -2.51126600 | -0.65916900 | -0.90733600 |
| C | -3.07578100 | 0.42299300  | 1.19005700  |
| C | -3.78043900 | -0.35773400 | -1.39780100 |
| H | -1.80157500 | -1.19429900 | -1.52908900 |
| C | -4.33889000 | 0.71963600  | 0.69000800  |
| H | -2.79366800 | 0.72361000  | 2.19396200  |
| C | -4.69818700 | 0.33132500  | -0.60418900 |
| H | -4.05100900 | -0.66334800 | -2.40463100 |
| H | -5.04744400 | 1.25660900  | 1.31468700  |
| H | -5.68664300 | 0.56482800  | -0.98936300 |

### **TSXA (ba)**

|   |             |             |             |
|---|-------------|-------------|-------------|
| C | 3.71672400  | -1.26049800 | -0.17529500 |
| C | 3.90858000  | 0.10664500  | -0.35383900 |
| C | 2.82901900  | 1.00713500  | -0.25110300 |
| C | 1.58062400  | 0.49302300  | 0.03955500  |
| C | 1.38753800  | -0.88792000 | 0.21666000  |
| C | 2.43735500  | -1.77815200 | 0.11176600  |
| C | 0.17763400  | 1.11420400  | 0.23095600  |
| C | -0.62686000 | 0.65255300  | -0.99903500 |
| C | -0.85796100 | -0.68358800 | -0.82008800 |
| C | -0.11714600 | -1.01775500 | 0.49490400  |
| O | -0.34407600 | 0.19605100  | 1.23388700  |
| O | -2.79515100 | 1.56157400  | -0.48014900 |
| N | -3.27537900 | 0.46212300  | -0.20495900 |
| C | -3.06092900 | -0.71981900 | -0.13797500 |
| C | -3.65466500 | -2.01993300 | 0.22083200  |
| H | 4.56298600  | -1.93788400 | -0.25419000 |
| H | 4.90349700  | 0.48680900  | -0.57041500 |
| H | 2.98919800  | 2.07374200  | -0.38882300 |
| H | 2.29620700  | -2.84744800 | 0.25164900  |
| H | -0.71099900 | 1.22284400  | -1.91401200 |
| H | -1.04940400 | -1.40359200 | -1.60833500 |
| H | -0.44661200 | -1.88937800 | 1.06184700  |
| H | -4.71339900 | -1.90213900 | 0.47578300  |
| H | -3.14003100 | -2.45757500 | 1.08388600  |
| H | -3.57651300 | -2.72769700 | -0.61186300 |
| C | 0.07614000  | 2.55234500  | 0.67716400  |
| H | 0.65254400  | 2.70937200  | 1.59411300  |
| H | 0.46837200  | 3.21989200  | -0.09834300 |

|   |             |            |            |
|---|-------------|------------|------------|
| H | -0.97070900 | 2.80775900 | 0.85650700 |
|---|-------------|------------|------------|

### **TSNA (ba)**

|   |             |             |             |
|---|-------------|-------------|-------------|
| C | -0.40081500 | 2.96419800  | -0.24451500 |
| C | 0.48563000  | 2.82360600  | 0.82230300  |
| C | 1.19958700  | 1.62729500  | 1.01589400  |
| C | 1.00212000  | 0.59909400  | 0.11276400  |
| C | 0.09888300  | 0.73563800  | -0.95293600 |
| C | -0.60901200 | 1.90788800  | -1.15021200 |
| C | 1.60828000  | -0.80330000 | -0.06170400 |
| C | 0.50523700  | -1.84727300 | 0.23449600  |
| C | -0.41974100 | -1.70824100 | -0.76443700 |
| C | 0.18354200  | -0.60512200 | -1.68011900 |
| O | 1.60008700  | -0.87277000 | -1.52472700 |
| C | -2.19834500 | -0.82871200 | 0.36417500  |
| N | -1.70461000 | -0.76602100 | 1.46438500  |
| O | -0.67320500 | -0.99787600 | 2.09903000  |
| C | 2.98242700  | -1.06847800 | 0.50563100  |
| C | -3.42839500 | -0.51444500 | -0.38594200 |
| H | -0.93097500 | 3.90279800  | -0.38368900 |
| H | 0.63469500  | 3.65231000  | 1.50946600  |
| H | 1.88826600  | 1.52788500  | 1.85064900  |
| H | -1.29298300 | 2.02747700  | -1.98794800 |
| H | 0.62423000  | -2.66570200 | 0.92964300  |
| H | -1.09289900 | -2.47698500 | -1.12553000 |
| H | -0.10580100 | -0.62984000 | -2.73114700 |
| H | 3.32934300  | -2.06489800 | 0.21417100  |
| H | 3.69784100  | -0.32786100 | 0.13585600  |
| H | 2.95718200  | -1.01636300 | 1.59933500  |
| H | -4.24546500 | -0.27061300 | 0.30149000  |
| H | -3.73699300 | -1.36677300 | -1.00078600 |
| H | -3.26562600 | 0.34298800  | -1.04902100 |

### **TSXS (ba)**

|   |             |             |             |
|---|-------------|-------------|-------------|
| C | 3.97233200  | -0.49578900 | -0.32752100 |
| C | 3.76536700  | 0.87159900  | -0.48632900 |
| C | 2.48646000  | 1.43516300  | -0.30132600 |
| C | 1.45000600  | 0.59172200  | 0.04699600  |
| C | 1.66055500  | -0.78856200 | 0.20828300  |
| C | 2.90762900  | -1.35090800 | 0.02125100  |
| C | -0.05493900 | 0.79634600  | 0.33795400  |
| C | -0.81000100 | 0.13983700  | -0.85254400 |
| C | -0.56756600 | -1.20122900 | -0.71395200 |
| C | 0.26898800  | -1.33452400 | 0.56210800  |
| O | -0.24327500 | -0.23273100 | 1.34028200  |
| C | -3.09570900 | 0.21031800  | -0.31699400 |
| N | -3.20075900 | -0.95263600 | -0.01732800 |
| O | -2.59940500 | -2.02103800 | 0.08209900  |
| C | -0.48535000 | 2.15181900  | 0.84865300  |
| C | -3.88613700 | 1.44281500  | -0.50515100 |

|   |             |             |             |
|---|-------------|-------------|-------------|
| H | 4.96708500  | -0.90983600 | -0.46978000 |
| H | 4.60010100  | 1.51499900  | -0.75207600 |
| H | 2.33651400  | 2.50515200  | -0.42525300 |
| H | 3.07680900  | -2.41786800 | 0.14532500  |
| H | -1.00172000 | 0.65022700  | -1.79028800 |
| H | -0.64581500 | -1.96825200 | -1.47209300 |
| H | 0.20782100  | -2.27041700 | 1.11520800  |
| H | -1.51564300 | 2.10950700  | 1.21173600  |
| H | -0.42392200 | 2.90391500  | 0.05399600  |
| H | 0.15748600  | 2.46958600  | 1.67528700  |
| H | -3.71172000 | 1.86135800  | -1.50260300 |
| H | -4.95594600 | 1.22997300  | -0.40449400 |
| H | -3.61411700 | 2.20863100  | 0.22872200  |

### **TSNS (ba)**

|   |             |             |             |
|---|-------------|-------------|-------------|
| C | -2.98722200 | -0.78936100 | 0.04307700  |
| C | -2.51050400 | -0.71197800 | 1.35091100  |
| C | -1.31356600 | -0.03175400 | 1.64156300  |
| C | -0.63322900 | 0.56308400  | 0.59345300  |
| C | -1.12179400 | 0.49471500  | -0.72062300 |
| C | -2.28873300 | -0.18419800 | -1.01708500 |
| C | 0.65396700  | 1.39356300  | 0.48566200  |
| C | 1.69623600  | 0.55080800  | -0.31775200 |
| C | 1.22187500  | 0.54480600  | -1.60170100 |
| C | -0.11497400 | 1.30780800  | -1.53629500 |
| O | 0.22888000  | 2.32455700  | -0.55813600 |
| C | 1.48883000  | -1.64403600 | 0.26982900  |
| N | 1.00041700  | -2.06205600 | -0.75254400 |
| O | 0.62425500  | -1.72424100 | -1.87698300 |
| C | 1.14985100  | 2.12667300  | 1.70985100  |
| C | 1.90706100  | -2.06080800 | 1.62111600  |
| H | -3.91561700 | -1.31659500 | -0.15991100 |
| H | -3.07367400 | -1.17482200 | 2.15719100  |
| H | -0.95470400 | 0.03392900  | 2.66655600  |
| H | -2.66648100 | -0.24851600 | -2.03407700 |
| H | 2.73645800  | 0.47763500  | -0.02001900 |
| H | 1.75206500  | 0.31526600  | -2.51387500 |
| H | -0.46726300 | 1.75739600  | -2.46438100 |
| H | 2.01608800  | 2.74680400  | 1.45840600  |
| H | 0.36328500  | 2.77347100  | 2.11009700  |
| H | 1.44731600  | 1.41872300  | 2.49176900  |
| H | 1.93045200  | -3.15326100 | 1.69621700  |
| H | 1.21081000  | -1.67658700 | 2.37542900  |
| H | 2.90647200  | -1.67751200 | 1.85332800  |

### **TSXA (bb)**

|   |             |             |             |
|---|-------------|-------------|-------------|
| C | -4.04868100 | -2.44333200 | 0.01733700  |
| C | -4.82055700 | -1.28573200 | 0.06341800  |
| C | -4.21982000 | -0.01325300 | -0.01787800 |
| C | -2.84674500 | 0.04804900  | -0.15317600 |

|   |             |             |             |
|---|-------------|-------------|-------------|
| C | -2.06798300 | -1.12112200 | -0.19631500 |
| C | -2.64682000 | -2.37159500 | -0.11095300 |
| C | -1.82700700 | 1.20433800  | -0.27255000 |
| C | -1.05184300 | 1.18287200  | 1.05898500  |
| C | -0.26230900 | 0.06642200  | 1.01758900  |
| C | -0.62855300 | -0.60332700 | -0.32678100 |
| O | -0.85134300 | 0.56309000  | -1.14090700 |
| O | 0.56474200  | 2.89628100  | 0.63774100  |
| N | 1.49954000  | 2.11423300  | 0.49291000  |
| C | 1.82417900  | 0.94888300  | 0.50859400  |
| H | -4.53169700 | -3.41512700 | 0.07698000  |
| H | -5.90054700 | -1.36247300 | 0.15828400  |
| H | -4.83084200 | 0.88548300  | 0.01562100  |
| H | -2.05121200 | -3.28078100 | -0.14838000 |
| H | -1.32379500 | 1.76774300  | 1.92725500  |
| H | 0.11297200  | -0.46672500 | 1.88367100  |
| H | 0.10717400  | -1.26562700 | -0.78297200 |
| C | 2.93666400  | 0.08206600  | 0.20933100  |
| C | 3.98205900  | 0.52999800  | -0.62423200 |
| C | 2.99049900  | -1.22041900 | 0.73423100  |
| C | 5.05479000  | -0.30794800 | -0.90998200 |
| H | 3.93855400  | 1.53338900  | -1.03546100 |
| C | 4.06616500  | -2.05416900 | 0.43541600  |
| H | 2.19083500  | -1.57153400 | 1.37792300  |
| C | 5.10141500  | -1.60258700 | -0.38455300 |
| H | 5.85635900  | 0.04976600  | -1.55034400 |
| H | 4.09612500  | -3.05857900 | 0.84843200  |
| H | 5.93932700  | -2.25449500 | -0.61466200 |
| C | -2.29622000 | 2.52612300  | -0.82959300 |
| H | -3.02267400 | 2.98856600  | -0.15170500 |
| H | -1.44588000 | 3.20300700  | -0.93953300 |
| H | -2.77407200 | 2.38118400  | -1.80347500 |

### **TSNA (bb)**

|   |             |             |             |
|---|-------------|-------------|-------------|
| C | 0.84168500  | 2.94391800  | -0.55600100 |
| C | 1.89946600  | 2.89922400  | 0.35162700  |
| C | 2.58713300  | 1.69833400  | 0.60070600  |
| C | 2.19045900  | 0.56838100  | -0.09096100 |
| C | 1.12139100  | 0.61251200  | -0.99877200 |
| C | 0.43261400  | 1.78705500  | -1.24290500 |
| C | 2.69265100  | -0.88282600 | -0.14478000 |
| C | 1.60775000  | -1.79263200 | 0.48240200  |
| C | 0.53695500  | -1.74307000 | -0.36845600 |
| C | 1.02360200  | -0.81990100 | -1.52224900 |
| O | 2.43189100  | -1.16188100 | -1.55835200 |
| C | -1.02147900 | -0.60823500 | 0.88025600  |
| N | -0.33944400 | -0.40787400 | 1.86409500  |
| O | 0.77424600  | -0.59680700 | 2.34696300  |
| C | 4.12911200  | -1.16345700 | 0.22725600  |
| H | 0.32926600  | 3.88478900  | -0.73888600 |

|   |             |             |             |
|---|-------------|-------------|-------------|
| H | 2.20129200  | 3.80562700  | 0.86988400  |
| H | 3.40736600  | 1.67210500  | 1.31324000  |
| H | -0.39658700 | 1.82689700  | -1.94500600 |
| H | 1.80400700  | -2.50606500 | 1.26996200  |
| H | -0.21246300 | -2.51538800 | -0.49324500 |
| H | 0.56131500  | -0.97056200 | -2.49838200 |
| H | 4.37265100  | -2.21488700 | 0.04465300  |
| H | 4.80464100  | -0.54041000 | -0.36641400 |
| H | 4.29538900  | -0.94794800 | 1.28816600  |
| C | -2.35934900 | -0.37430100 | 0.39360900  |
| C | -3.32768700 | 0.21041700  | 1.23608000  |
| C | -2.71908100 | -0.72674700 | -0.91786500 |
| C | -4.61755000 | 0.43450200  | 0.76743100  |
| H | -3.05222500 | 0.48381200  | 2.24957400  |
| C | -4.01515600 | -0.49874300 | -1.37667900 |
| H | -1.98217100 | -1.17807600 | -1.57356900 |
| C | -4.96840700 | 0.08156400  | -0.53914600 |
| H | -5.35354900 | 0.88691400  | 1.42642600  |
| H | -4.27887200 | -0.77629200 | -2.39342900 |
| H | -5.97769300 | 0.25813900  | -0.89985600 |

### **TSXS (bb)**

|   |             |             |             |
|---|-------------|-------------|-------------|
| C | -5.12163700 | -0.68532900 | -0.26073400 |
| C | -4.45869200 | -1.90939400 | -0.24302700 |
| C | -3.06699300 | -1.97433200 | -0.02836300 |
| C | -2.38490900 | -0.78987900 | 0.16960500  |
| C | -3.05556700 | 0.44476500  | 0.15245600  |
| C | -4.41702200 | 0.51949600  | -0.06556200 |
| C | -0.90353900 | -0.43167700 | 0.43407200  |
| C | -0.40386300 | 0.27248000  | -0.86004700 |
| C | -1.09064000 | 1.45784000  | -0.89358300 |
| C | -1.93875700 | 1.47333300  | 0.38198000  |
| O | -1.08994800 | 0.73052000  | 1.28103700  |
| C | 1.76187700  | 1.07477800  | -0.35423100 |
| N | 1.43944500  | 2.23299500  | -0.20417000 |
| O | 0.49321900  | 3.01363100  | -0.24672200 |
| C | -0.04804300 | -1.48023100 | 1.10592600  |
| H | -6.19591000 | -0.65706200 | -0.42298200 |
| H | -5.02038900 | -2.82789600 | -0.39197600 |
| H | -2.55934800 | -2.93592600 | -0.01344300 |
| H | -4.94141600 | 1.47199500  | -0.07960600 |
| H | -0.04116300 | -0.26284700 | -1.73023800 |
| H | -1.26922200 | 2.09167400  | -1.75154000 |
| H | -2.20749500 | 2.44146200  | 0.80162300  |
| H | 0.92027300  | -1.06342600 | 1.39221300  |
| H | 0.12719700  | -2.32523800 | 0.43070300  |
| H | -0.54817000 | -1.85434300 | 2.00455000  |
| C | 2.91022800  | 0.20874000  | -0.23120200 |
| C | 3.92747200  | 0.50180200  | 0.69967600  |
| C | 3.02612800  | -0.93918700 | -1.03353500 |

|   |            |             |             |
|---|------------|-------------|-------------|
| C | 5.03541000 | -0.33303600 | 0.80855400  |
| H | 3.83629500 | 1.38507400  | 1.32375600  |
| C | 4.13627300 | -1.77183700 | -0.91212400 |
| H | 2.24579800 | -1.16943800 | -1.75156900 |
| C | 5.14410700 | -1.47251600 | 0.00650800  |
| H | 5.81580500 | -0.09482200 | 1.52604500  |
| H | 4.21542100 | -2.65499800 | -1.53988700 |
| H | 6.00903700 | -2.12326400 | 0.09881100  |

### **TSNS (bb)**

|   |             |             |             |
|---|-------------|-------------|-------------|
| C | -2.09241100 | 2.82042300  | -0.43313200 |
| C | -1.00500600 | 2.57438200  | -1.27115200 |
| C | -0.57269100 | 1.25998200  | -1.52473600 |
| C | -1.26761900 | 0.22239200  | -0.92825800 |
| C | -2.36663200 | 0.47187000  | -0.09190100 |
| C | -2.78776600 | 1.76112900  | 0.17601200  |
| C | -1.14382400 | -1.30832100 | -0.96293300 |
| C | -0.71051100 | -1.78508800 | 0.46039900  |
| C | -1.80786000 | -1.56737100 | 1.24917900  |
| C | -2.84932500 | -0.92038400 | 0.31469300  |
| O | -2.56590300 | -1.64683400 | -0.90985000 |
| C | 0.79518500  | -0.27317100 | 1.30428000  |
| N | 0.07789800  | 0.23502800  | 2.14207200  |
| O | -1.05508400 | 0.18778100  | 2.61807800  |
| C | -0.46387300 | -1.95433500 | -2.14678200 |
| H | -2.41227500 | 3.84360700  | -0.25410300 |
| H | -0.48891100 | 3.40777200  | -1.74098800 |
| H | 0.27751900  | 1.07702700  | -2.17693400 |
| H | -3.63252000 | 1.95940300  | 0.83045800  |
| H | 0.03969600  | -2.55146400 | 0.61480300  |
| H | -2.03265100 | -1.98986500 | 2.21742300  |
| H | -3.89494100 | -1.02650000 | 0.60290200  |
| H | -0.54062700 | -3.04453100 | -2.08192100 |
| H | -0.93374000 | -1.62799500 | -3.07951000 |
| H | 0.59671000  | -1.68163600 | -2.17628400 |
| C | 2.08605300  | -0.09428800 | 0.68318900  |
| C | 2.63854300  | 1.19599000  | 0.55466200  |
| C | 2.79862000  | -1.19769100 | 0.18293600  |
| C | 3.88234200  | 1.36591400  | -0.04559600 |
| H | 2.08143700  | 2.04883800  | 0.92817900  |
| C | 4.03873100  | -1.01567600 | -0.42591200 |
| H | 2.38050500  | -2.19450500 | 0.27992600  |
| C | 4.58566300  | 0.26375000  | -0.54014000 |
| H | 4.30201800  | 2.36428200  | -0.13355900 |
| H | 4.58096900  | -1.87677200 | -0.80636900 |
| H | 5.55371100  | 0.40253100  | -1.01319200 |

### **TSXA (ca)**

|   |             |             |            |
|---|-------------|-------------|------------|
| C | -3.63162400 | -2.22051300 | 0.08032700 |
| C | -3.86518000 | -0.93518400 | 0.55921200 |

|    |             |             |             |
|----|-------------|-------------|-------------|
| C  | -2.82943000 | 0.01989500  | 0.60309300  |
| C  | -1.57712000 | -0.34939200 | 0.14828600  |
| C  | -1.34225900 | -1.65554700 | -0.31964300 |
| C  | -2.34859500 | -2.59918500 | -0.36296200 |
| C  | -0.20152700 | 0.36578900  | 0.04400600  |
| C  | 0.63085400  | -0.31896500 | 1.14935600  |
| C  | 0.90578800  | -1.58121200 | 0.69671300  |
| C  | 0.15538200  | -1.67087300 | -0.65032000 |
| O  | 0.32601900  | -0.32983100 | -1.13468000 |
| O  | 2.90938600  | 0.62714600  | 1.07573100  |
| N  | 3.36416000  | -0.36913700 | 0.51044600  |
| C  | 3.11130900  | -1.46569900 | 0.08535800  |
| C  | 3.68127500  | -2.63268000 | -0.61104900 |
| H  | -4.44478900 | -2.94085500 | 0.04833300  |
| H  | -4.85969400 | -0.65991200 | 0.90043300  |
| H  | -3.02828400 | 1.01845600  | 0.98356800  |
| H  | -2.16896100 | -3.60802700 | -0.72762100 |
| H  | 0.69729000  | 0.04141000  | 2.16611600  |
| H  | 1.11304700  | -2.43904300 | 1.32758700  |
| H  | 0.49982600  | -2.40106100 | -1.38416600 |
| H  | 4.75968500  | -2.50580300 | -0.75455600 |
| H  | 3.21585900  | -2.76322500 | -1.59466300 |
| H  | 3.51461400  | -3.54969900 | -0.03511600 |
| C  | 1.50093700  | 2.70987700  | -1.07645900 |
| H  | 1.56125500  | 3.78987600  | -1.26055800 |
| H  | 2.35188900  | 2.41038000  | -0.45845600 |
| H  | 1.58684000  | 2.19692600  | -2.04075100 |
| C  | -0.28323400 | 3.11876800  | 1.44630900  |
| H  | -0.27958200 | 4.20946900  | 1.32981100  |
| H  | -1.21062100 | 2.84781300  | 1.96543800  |
| H  | 0.55715700  | 2.85449300  | 2.09860900  |
| C  | -1.56239700 | 2.76816500  | -1.36993600 |
| H  | -2.54390500 | 2.58738400  | -0.91932200 |
| H  | -1.49864100 | 3.83547500  | -1.61634100 |
| H  | -1.52354600 | 2.20795700  | -2.31141800 |
| Si | -0.12834900 | 2.26814000  | -0.23944300 |

### **TSNA (ca)**

|   |             |             |             |
|---|-------------|-------------|-------------|
| C | -2.23590100 | 2.71966800  | -0.10771800 |
| C | -1.24811200 | 2.82897000  | 0.86907900  |
| C | -0.18755200 | 1.90712100  | 0.93236400  |
| C | -0.14268800 | 0.89120100  | -0.00676500 |
| C | -1.15302700 | 0.77185400  | -0.97680600 |
| C | -2.20012500 | 1.67304800  | -1.04677300 |
| C | 0.84219800  | -0.25552200 | -0.31203900 |
| C | 0.12872400  | -1.58728600 | 0.03196900  |
| C | -0.89869500 | -1.71219400 | -0.86541500 |
| C | -0.75580300 | -0.46346100 | -1.77912000 |
| O | 0.68225200  | -0.29416800 | -1.78203200 |
| C | -2.72487800 | -1.44167400 | 0.47316300  |

|    |             |             |             |
|----|-------------|-------------|-------------|
| N  | -2.16231900 | -1.25636000 | 1.52561800  |
| O  | -1.04892400 | -1.17611000 | 2.04980700  |
| C  | -4.06378200 | -1.50197700 | -0.14181700 |
| H  | -3.03760400 | 3.45243200  | -0.14884700 |
| H  | -1.29088100 | 3.64272100  | 1.58826100  |
| H  | 0.57058600  | 2.00366200  | 1.70443600  |
| H  | -2.96979200 | 1.59326400  | -1.81184900 |
| H  | 0.54132700  | -2.35386500 | 0.67139900  |
| H  | -1.34386300 | -2.64217400 | -1.20008900 |
| H  | -1.14273200 | -0.55368000 | -2.79505500 |
| H  | -4.84005500 | -1.52982500 | 0.63035600  |
| H  | -4.16517100 | -2.39641000 | -0.76592500 |
| H  | -4.23579000 | -0.62372000 | -0.77456100 |
| Si | 2.70621400  | -0.09729600 | 0.10400800  |
| C  | 3.58566900  | -1.55894900 | -0.71080600 |
| H  | 4.67171800  | -1.49399300 | -0.57191400 |
| H  | 3.25544300  | -2.51646200 | -0.29089800 |
| H  | 3.38090600  | -1.57972900 | -1.78660600 |
| C  | 2.94141800  | -0.16401900 | 1.98220700  |
| H  | 4.00939800  | -0.17156400 | 2.23353400  |
| H  | 2.49021100  | 0.69710400  | 2.48793900  |
| H  | 2.49391900  | -1.06728600 | 2.41308000  |
| C  | 3.34173300  | 1.53343100  | -0.60579700 |
| H  | 2.84609500  | 2.39522400  | -0.14507900 |
| H  | 4.42146900  | 1.64127600  | -0.44625000 |
| H  | 3.15235400  | 1.58065800  | -1.68391800 |

### **TSXS (ca)**

|   |             |             |             |
|---|-------------|-------------|-------------|
| C | -4.25124600 | -0.79586600 | 0.35609100  |
| C | -3.88395300 | 0.41396100  | 0.93729000  |
| C | -2.55116500 | 0.86924000  | 0.87859200  |
| C | -1.61874900 | 0.08856200  | 0.22074000  |
| C | -1.99300900 | -1.14052100 | -0.35372800 |
| C | -3.29417400 | -1.59880100 | -0.29540200 |
| C | -0.09244800 | 0.20649000  | -0.04445300 |
| C | 0.53714000  | -0.87357100 | 0.89241100  |
| C | 0.13946900  | -2.07070800 | 0.35320100  |
| C | -0.67725900 | -1.71734600 | -0.89118800 |
| O | -0.02110800 | -0.50905600 | -1.31620400 |
| C | 2.86613200  | -1.09509200 | 0.59191100  |
| N | 2.82440500  | -2.07873700 | -0.10753500 |
| O | 2.06716500  | -2.89446900 | -0.63275000 |
| C | 3.82311300  | -0.25548600 | 1.34165000  |
| H | -5.28523700 | -1.12680900 | 0.40603300  |
| H | -4.63329800 | 1.01955500  | 1.44039200  |
| H | -2.28141300 | 1.81442000  | 1.34343700  |
| H | -3.58292300 | -2.54942100 | -0.73758500 |
| H | 0.72717100  | -0.69964400 | 1.94558800  |
| H | 0.09433800  | -3.02969000 | 0.85117300  |
| H | -0.72270400 | -2.44848300 | -1.69714500 |
| H | 3.70539300  | 0.80339300  | 1.09414400  |



|    |             |             |             |
|----|-------------|-------------|-------------|
| H  | 3.66794700  | -0.36685000 | 2.42138600  |
| H  | 4.85225600  | -0.55223900 | 1.11139700  |
| Si | 0.65296000  | 1.95733800  | -0.30839300 |
| C  | 2.16849400  | 1.81917500  | -1.42861000 |
| H  | 1.86234000  | 1.44356100  | -2.41100100 |
| H  | 2.63546300  | 2.80150900  | -1.57234600 |
| H  | 2.92878800  | 1.13189500  | -1.04746300 |
| C  | 1.08774400  | 2.71468300  | 1.37652600  |
| H  | 1.53073700  | 3.71023700  | 1.24962500  |
| H  | 0.19721700  | 2.83304200  | 2.00603900  |
| H  | 1.80513600  | 2.10409300  | 1.93699900  |
| C  | -0.61811200 | 3.04619700  | -1.18954600 |
| H  | -1.49249800 | 3.26570600  | -0.56859000 |
| H  | -0.16529800 | 4.00195300  | -1.48163500 |
| H  | -0.97602000 | 2.55490300  | -2.10147300 |

### **TSNS (ca)**

|   |             |             |             |
|---|-------------|-------------|-------------|
| C | 2.74096600  | -2.27309100 | 0.71157400  |
| C | 1.80937400  | -2.06292400 | 1.72643500  |
| C | 0.63104400  | -1.33367700 | 1.48314800  |
| C | 0.41550700  | -0.84042700 | 0.20653800  |
| C | 1.35552200  | -1.06216200 | -0.81509300 |
| C | 2.52301100  | -1.76356100 | -0.58074300 |
| C | -0.70969000 | -0.03016600 | -0.46156600 |
| C | -0.11014000 | 1.37278200  | -0.81950300 |
| C | 0.75893600  | 1.13175700  | -1.85151700 |
| C | 0.74376800  | -0.39472700 | -2.04590400 |
| O | -0.65912000 | -0.66211000 | -1.79736700 |
| C | 1.33887600  | 2.03874500  | 0.82641400  |
| N | 2.37490200  | 1.91857400  | 0.21639900  |
| O | 2.84074300  | 1.58971600  | -0.87737400 |
| C | 0.80868200  | 2.42143800  | 2.14842900  |
| H | 3.64330000  | -2.84243200 | 0.91827900  |
| H | 1.99024100  | -2.47266700 | 2.71687300  |
| H | -0.08815800 | -1.18069700 | 2.28434700  |
| H | 3.25582800  | -1.92360000 | -1.36723800 |
| H | -0.64164100 | 2.30278900  | -0.65236100 |
| H | 1.15693000  | 1.83423800  | -2.56862700 |
| H | 1.05054200  | -0.76667000 | -3.02366600 |
| H | 1.59948700  | 2.86341800  | 2.76402400  |
| H | 0.40830900  | 1.54646300  | 2.67206200  |
| H | 0.00062900  | 3.15395000  | 2.04643100  |
| C | -3.59382100 | 0.79080800  | -1.10767800 |
| H | -3.42246600 | 0.40241600  | -2.11727300 |
| H | -4.66014800 | 0.67952800  | -0.87631000 |
| H | -3.36879200 | 1.86381700  | -1.12228500 |
| C | -2.70824700 | 0.66050200  | 1.85466100  |
| H | -3.75851200 | 0.62975900  | 2.17050900  |
| H | -2.12349200 | 0.14175600  | 2.62314000  |
| H | -2.40181800 | 1.71342100  | 1.85241100  |
| C | -3.01118100 | -1.96116300 | 0.20907600  |

|    |             |             |             |
|----|-------------|-------------|-------------|
| H  | -2.40356200 | -2.51508600 | 0.93355200  |
| H  | -4.06471700 | -2.08352500 | 0.48822600  |
| H  | -2.86199300 | -2.42726700 | -0.77084500 |
| Si | -2.52449400 | -0.13823500 | 0.14330400  |

### **TSXA (da)**

|   |             |             |             |
|---|-------------|-------------|-------------|
| C | 3.73183300  | -1.61768600 | 0.01902800  |
| C | 3.92483400  | -0.28926000 | -0.35330400 |
| C | 2.84591300  | 0.61527000  | -0.40041700 |
| C | 1.59837200  | 0.13894900  | -0.04990900 |
| C | 1.39773500  | -1.20135200 | 0.31862300  |
| C | 2.45011500  | -2.09500000 | 0.35711600  |
| C | 0.18767000  | 0.76345600  | 0.02584800  |
| C | -0.59389600 | 0.14761700  | -1.14960900 |
| C | -0.82344300 | -1.15239600 | -0.79171600 |
| C | -0.11245300 | -1.30075700 | 0.57475100  |
| O | -0.36139500 | 0.00648900  | 1.13278200  |
| O | -2.75345700 | 1.11620800  | -0.71969400 |
| N | -3.24721100 | 0.04894400  | -0.35324500 |
| C | -3.04212700 | -1.12257600 | -0.17350500 |
| C | -3.65389400 | -2.38641500 | 0.27379000  |
| H | 4.58000600  | -2.29646300 | 0.05000500  |
| H | 4.92219900  | 0.05679900  | -0.61115800 |
| H | 2.98816300  | 1.64909400  | -0.69865800 |
| H | 2.30755800  | -3.13437400 | 0.64334300  |
| H | -0.65394300 | 0.60592500  | -2.12618000 |
| H | -0.98773800 | -1.97404500 | -1.47995900 |
| H | -0.45736200 | -2.08365700 | 1.25081400  |
| H | -4.71061200 | -2.23517400 | 0.51884300  |
| H | -3.14546200 | -2.77109400 | 1.16500100  |
| H | -3.58607500 | -3.15028100 | -0.50869200 |
| C | 0.09847100  | 2.27029200  | 0.19007700  |
| O | 0.66508100  | 2.97278900  | -0.62781600 |
| C | -0.70663200 | 2.80639400  | 1.34505300  |
| H | -0.61625100 | 3.89381600  | 1.38097400  |
| H | -1.75429200 | 2.51666400  | 1.20465800  |
| H | -0.37254600 | 2.35707900  | 2.28658900  |

### **TSNA (da)**

|   |             |             |             |
|---|-------------|-------------|-------------|
| C | -1.42877100 | 2.85299900  | -0.11006200 |
| C | -0.47449100 | 2.85748400  | 0.90738400  |
| C | 0.47921300  | 1.82935200  | 1.00961400  |
| C | 0.44229100  | 0.82687200  | 0.05953800  |
| C | -0.52694700 | 0.80570300  | -0.95422500 |
| C | -1.47062100 | 1.81286700  | -1.05617800 |
| C | 1.29953600  | -0.42379000 | -0.21403800 |
| C | 0.45500100  | -1.67341900 | 0.11575800  |
| C | -0.52963500 | -1.70051200 | -0.83719000 |
| C | -0.22180700 | -0.47023600 | -1.73901800 |
| O | 1.22867600  | -0.44716700 | -1.67003000 |

|   |             |             |             |
|---|-------------|-------------|-------------|
| C | -2.40038900 | -1.25013200 | 0.36072400  |
| N | -1.88472300 | -1.10684300 | 1.44386800  |
| O | -0.80338600 | -1.12530300 | 2.03149500  |
| C | -3.70334100 | -1.19945000 | -0.32841100 |
| H | -2.14752500 | 3.66552200  | -0.17593000 |
| H | -0.46293700 | 3.66984000  | 1.62895300  |
| H | 1.21584500  | 1.82417300  | 1.80750900  |
| H | -2.21612300 | 1.81846600  | -1.84844100 |
| H | 0.78513100  | -2.45129800 | 0.78683600  |
| H | -1.03867300 | -2.58507800 | -1.20128400 |
| H | -0.55977700 | -0.52327900 | -2.77402800 |
| H | -4.52066600 | -1.15841300 | 0.39941600  |
| H | -3.84531400 | -2.08566500 | -0.95637500 |
| H | -3.76685300 | -0.31348300 | -0.97072800 |
| C | 2.72290500  | -0.38312700 | 0.31394600  |
| O | 2.92534900  | -0.59942500 | 1.49365000  |
| C | 3.81295100  | -0.03397300 | -0.67159800 |
| H | 3.60086000  | 0.93405100  | -1.14034400 |
| H | 4.77566700  | -0.00541900 | -0.15784900 |
| H | 3.83294600  | -0.77018500 | -1.48320200 |

### **TSXS (da)**

|   |             |             |             |
|---|-------------|-------------|-------------|
| C | 4.08734600  | -0.56489400 | -0.27487400 |
| C | 3.78063400  | 0.73372400  | -0.67321500 |
| C | 2.45876600  | 1.21780800  | -0.60568500 |
| C | 1.48960400  | 0.36341600  | -0.12108000 |
| C | 1.79262600  | -0.94955400 | 0.27840200  |
| C | 3.08453400  | -1.43232300 | 0.20275600  |
| C | -0.03835500 | 0.47758800  | 0.10282800  |
| C | -0.70690400 | -0.41048200 | -0.97544100 |
| C | -0.38012500 | -1.68608400 | -0.59830800 |
| C | 0.43638100  | -1.54119800 | 0.69181000  |
| O | -0.17862500 | -0.36440900 | 1.26615300  |
| C | -2.95974800 | -0.32963900 | -0.46631500 |
| N | -3.02632300 | -1.41824100 | 0.04855200  |
| O | -2.38514300 | -2.42751000 | 0.34163700  |
| C | -3.77310800 | 0.82363000  | -0.90252500 |
| H | 5.11404700  | -0.91628700 | -0.33251400 |
| H | 4.56962200  | 1.38471900  | -1.03999700 |
| H | 2.21756300  | 2.22792000  | -0.92582200 |
| H | 3.33261700  | -2.44657600 | 0.50569800  |
| H | -0.90259900 | -0.05890500 | -1.98040200 |
| H | -0.39517400 | -2.57833700 | -1.20870300 |
| H | 0.42720400  | -2.37060000 | 1.39684200  |
| H | -4.15894400 | 0.66699400  | -1.91721900 |
| H | -4.62298000 | 0.97367100  | -0.22723700 |
| H | -3.16658600 | 1.73259000  | -0.91114000 |
| C | -0.55924000 | 1.88359100  | 0.31846900  |
| O | -0.78685700 | 2.59033900  | -0.64955200 |
| C | -0.73221800 | 2.34669800  | 1.74447300  |

|   |             |            |            |
|---|-------------|------------|------------|
| H | 0.21566400  | 2.25264900 | 2.28713600 |
| H | -1.07614800 | 3.38275100 | 1.75755900 |
| H | -1.44618800 | 1.69606600 | 2.26224500 |

### **TSNS (da)**

|   |             |             |             |
|---|-------------|-------------|-------------|
| C | 2.45157000  | -2.01369600 | 0.97885400  |
| C | 1.55892300  | -1.67423400 | 1.99584200  |
| C | 0.33389000  | -1.05019000 | 1.70155500  |
| C | 0.04655400  | -0.80087400 | 0.37189200  |
| C | 0.93771500  | -1.14690900 | -0.65389600 |
| C | 2.15118100  | -1.74539100 | -0.36782300 |
| C | -1.14999500 | -0.17779500 | -0.37165400 |
| C | -0.69101300 | 1.18073500  | -0.98783900 |
| C | 0.15125500  | 0.81307700  | -2.00337000 |
| C | 0.22330600  | -0.72494100 | -1.93814400 |
| O | -1.15218900 | -1.02144900 | -1.55628200 |
| C | 0.68133400  | 2.17555600  | 0.48459700  |
| N | 1.72164100  | 2.02883000  | -0.11018900 |
| O | 2.20838800  | 1.56027800  | -1.14435200 |
| C | 0.06980100  | 2.71291300  | 1.71431000  |
| H | 3.39174000  | -2.49739700 | 1.22980600  |
| H | 1.81003900  | -1.89910800 | 3.02899600  |
| H | -0.36103400 | -0.78150600 | 2.49238500  |
| H | 2.85495800  | -2.00741200 | -1.15318900 |
| H | -1.30776400 | 2.06967300  | -0.94181800 |
| H | 0.48424900  | 1.40321400  | -2.84374800 |
| H | 0.49136100  | -1.24237400 | -2.85857500 |
| H | 0.75773900  | 2.61681000  | 2.56139000  |
| H | -0.84451600 | 2.15290300  | 1.93339500  |
| H | -0.19505800 | 3.77047000  | 1.59449100  |
| C | -2.46573300 | -0.17408100 | 0.37575400  |
| O | -2.61301000 | 0.59461700  | 1.31299300  |
| C | -3.52515600 | -1.15059600 | -0.06680300 |
| H | -3.13339100 | -2.17315900 | -0.01375900 |
| H | -4.41091600 | -1.04747100 | 0.56263800  |
| H | -3.77620000 | -0.97545800 | -1.11921300 |

### **3X (aa)**

|   |             |             |             |
|---|-------------|-------------|-------------|
| C | -3.50047800 | 1.05946400  | -0.40504600 |
| C | -3.70473100 | -0.32102900 | -0.44391600 |
| C | -2.66721800 | -1.21237600 | -0.12614800 |
| C | -1.44564400 | -0.67957600 | 0.25315800  |
| C | -1.24035700 | 0.70945800  | 0.29063500  |
| C | -2.25193400 | 1.59375600  | -0.04721400 |
| C | -0.09572600 | -1.27108000 | 0.62226900  |
| C | 0.83719900  | -1.06965500 | -0.60962700 |
| C | 1.08844000  | 0.46139500  | -0.56186400 |
| C | 0.21977700  | 0.86397200  | 0.68612000  |
| O | 0.41623600  | -0.27764200 | 1.53560600  |
| O | 2.12668300  | -1.68003800 | -0.40926500 |

|   |             |             |             |
|---|-------------|-------------|-------------|
| N | 3.10325400  | -0.68926000 | -0.21303800 |
| C | 2.57531300  | 0.47447200  | -0.30765200 |
| C | 3.40643900  | 1.70961100  | -0.16064200 |
| H | -4.31948900 | 1.73011200  | -0.65047200 |
| H | -4.68071200 | -0.71136400 | -0.71927400 |
| H | -2.83164200 | -2.28618300 | -0.16641700 |
| H | -2.09895900 | 2.66999000  | -0.02724100 |
| H | -0.06007800 | -2.26272800 | 1.07147700  |
| H | 0.41636000  | -1.46166400 | -1.53884300 |
| H | 0.80784900  | 1.02019500  | -1.45992000 |
| H | 0.51609100  | 1.77927300  | 1.19917700  |
| H | 4.45366200  | 1.44203000  | -0.00138700 |
| H | 3.06947000  | 2.31649100  | 0.68975800  |
| H | 3.33483000  | 2.33963600  | -1.05674900 |

### **3N (aa)**

|   |             |             |             |
|---|-------------|-------------|-------------|
| C | 2.71870400  | 1.33699300  | -0.14205800 |
| C | 2.94966800  | 0.39774200  | 0.86533900  |
| C | 2.10500700  | -0.71105400 | 1.02494600  |
| C | 1.05047000  | -0.85650000 | 0.13868100  |
| C | 0.81176600  | 0.09229100  | -0.86737400 |
| C | 1.63129800  | 1.20025400  | -1.01837000 |
| C | -0.05520800 | -1.87918700 | -0.02932800 |
| C | -1.40501200 | -1.26508900 | 0.47606800  |
| C | -1.68223900 | -0.18897800 | -0.59934300 |
| C | -0.44357000 | -0.39907300 | -1.56011400 |
| O | -0.29107000 | -1.83159000 | -1.45556900 |
| O | -1.32659600 | -0.56326700 | 1.72786800  |
| N | -1.50398900 | 0.81732300  | 1.50820800  |
| C | -1.72353300 | 1.04386000  | 0.26377700  |
| C | -1.97460500 | 2.43453000  | -0.22706000 |
| H | 3.39169700  | 2.18312500  | -0.25135500 |
| H | 3.79797400  | 0.52525700  | 1.53221500  |
| H | 2.28408500  | -1.43239000 | 1.81753800  |
| H | 1.45446700  | 1.93844200  | -1.79696900 |
| H | 0.14519100  | -2.90166600 | 0.28965600  |
| H | -2.17448100 | -2.03656900 | 0.56228900  |
| H | -2.60649800 | -0.34358600 | -1.16532100 |
| H | -0.60214100 | -0.10864500 | -2.59854000 |
| H | -1.97960100 | 3.13626800  | 0.61033100  |
| H | -2.93874000 | 2.49687900  | -0.74797900 |
| H | -1.19918200 | 2.74573900  | -0.93869400 |

### **3X (ab)**

|   |             |             |             |
|---|-------------|-------------|-------------|
| C | -4.04475400 | 2.07236800  | -0.28453800 |
| C | -4.77169500 | 0.88490500  | -0.38865600 |
| C | -4.16510100 | -0.35590600 | -0.13511100 |
| C | -2.83313200 | -0.36209300 | 0.24664600  |
| C | -2.10152800 | 0.83251700  | 0.34910900  |
| C | -2.68737100 | 2.05783100  | 0.07513400  |

|   |             |             |             |
|---|-------------|-------------|-------------|
| C | -1.82365400 | -1.45190500 | 0.56623900  |
| C | -0.88122200 | -1.57298400 | -0.66743000 |
| C | -0.05896900 | -0.26233800 | -0.56587100 |
| C | -0.69728600 | 0.38393400  | 0.72179600  |
| O | -0.96384600 | -0.78559700 | 1.51234600  |
| O | 0.07435300  | -2.64132800 | -0.49738400 |
| N | 1.34926000  | -2.11837300 | -0.29438800 |
| C | 1.32389600  | -0.83125600 | -0.34760100 |
| H | -4.53682900 | 3.02132100  | -0.47983300 |
| H | -5.82207200 | 0.92140800  | -0.66445000 |
| H | -4.73551600 | -1.27690800 | -0.22502100 |
| H | -2.12702000 | 2.98676600  | 0.14694000  |
| H | -2.18164200 | -2.39876300 | 0.96868100  |
| H | -1.41146500 | -1.74093600 | -1.60781800 |
| H | -0.11979400 | 0.39501400  | -1.43709100 |
| H | -0.06076900 | 1.07842100  | 1.26921500  |
| C | 2.55227800  | -0.03955800 | -0.18774900 |
| C | 2.53461100  | 1.35325800  | -0.36490400 |
| C | 3.77141500  | -0.66278000 | 0.14005800  |
| C | 3.70170700  | 2.10474200  | -0.22164100 |
| H | 1.60713400  | 1.85659400  | -0.62269900 |
| C | 4.93159300  | 0.08954600  | 0.28236400  |
| H | 3.78842400  | -1.73832800 | 0.28055200  |
| C | 4.90343800  | 1.47690200  | 0.10275300  |
| H | 3.66856500  | 3.18148100  | -0.36459700 |
| H | 5.86438800  | -0.40646100 | 0.53697100  |
| H | 5.81235600  | 2.06130400  | 0.21658200  |

### **3N (ab)**

|   |             |             |             |
|---|-------------|-------------|-------------|
| C | 1.50337000  | 2.89281900  | -0.27266100 |
| C | 2.55963000  | 2.58963100  | 0.58967700  |
| C | 3.02422100  | 1.27314800  | 0.72574900  |
| C | 2.42076600  | 0.29047700  | -0.04220200 |
| C | 1.35771600  | 0.59443300  | -0.90584900 |
| C | 0.87571700  | 1.88864400  | -1.02484900 |
| C | 2.61224000  | -1.20566300 | -0.18449400 |
| C | 1.43075300  | -1.94432000 | 0.53303700  |
| C | 0.23734300  | -1.60792500 | -0.38994300 |
| C | 0.95754200  | -0.74144300 | -1.49942700 |
| O | 2.22729600  | -1.42717200 | -1.56006200 |
| O | 1.08589900  | -1.42439900 | 1.82991900  |
| N | -0.16605200 | -0.80497500 | 1.77325800  |
| C | -0.67210300 | -0.91078500 | 0.59057900  |
| H | 1.16274100  | 3.92076100  | -0.36249800 |
| H | 3.02903400  | 3.38497500  | 1.16222900  |
| H | 3.83603400  | 1.04093600  | 1.40965500  |
| H | 0.04217000  | 2.12764200  | -1.67986000 |
| H | 3.60485000  | -1.61356200 | 0.00451700  |
| H | 1.64264200  | -3.01102300 | 0.63931400  |
| H | -0.22348500 | -2.48390800 | -0.85533600 |

|   |             |             |             |
|---|-------------|-------------|-------------|
| H | 0.47975300  | -0.74219100 | -2.47875800 |
| C | -2.00236000 | -0.36632500 | 0.28393200  |
| C | -2.55442800 | -0.51575000 | -0.99833900 |
| C | -2.74980900 | 0.31015400  | 1.26664600  |
| C | -3.81857500 | -0.00388200 | -1.29387600 |
| H | -1.99873900 | -1.04033200 | -1.77060700 |
| C | -4.00837300 | 0.81886200  | 0.96813400  |
| H | -2.32568300 | 0.42800300  | 2.25823500  |
| C | -4.54958100 | 0.66517200  | -0.31316300 |
| H | -4.23019400 | -0.13084600 | -2.29157500 |
| H | -4.57282500 | 1.33903700  | 1.73747400  |
| H | -5.53390500 | 1.06440300  | -0.54214800 |

### **3X (ba)**

|   |             |             |             |
|---|-------------|-------------|-------------|
| C | 3.48731100  | -1.34292800 | -0.27200600 |
| C | 3.69596900  | 0.00741200  | -0.55848500 |
| C | 2.66238400  | 0.94520500  | -0.40224700 |
| C | 1.43930700  | 0.49516200  | 0.06955500  |
| C | 1.23101100  | -0.86294000 | 0.35459400  |
| C | 2.23782300  | -1.79834200 | 0.17883700  |
| C | 0.09712100  | 1.17025000  | 0.33972500  |
| C | -0.83490900 | 0.73280400  | -0.84566400 |
| C | -1.09325400 | -0.76178300 | -0.52477800 |
| C | -0.22706300 | -0.93820100 | 0.77399200  |
| O | -0.41803000 | 0.33243500  | 1.40913900  |
| O | -2.12711400 | 1.36888400  | -0.78244600 |
| N | -3.10669900 | 0.43551900  | -0.40106200 |
| C | -2.57977800 | -0.72546600 | -0.27399600 |
| C | -3.41172700 | -1.90978400 | 0.10478600  |
| H | 4.30310500  | -2.05013800 | -0.39530000 |
| H | 4.67221400  | 0.33821200  | -0.90256100 |
| H | 2.83187900  | 1.99358600  | -0.63445900 |
| H | 2.08031800  | -2.85260000 | 0.39322500  |
| H | -0.40348500 | 0.95011100  | -1.82602700 |
| H | -0.81652600 | -1.47502200 | -1.30756000 |
| H | -0.52434400 | -1.74992300 | 1.43912900  |
| H | -4.45845800 | -1.61600500 | 0.21296000  |
| H | -3.07227000 | -2.34511800 | 1.05352300  |
| H | -3.34221900 | -2.69755900 | -0.65652400 |
| C | 0.07042200  | 2.63102100  | 0.71973200  |
| H | 0.66598500  | 2.79792600  | 1.62202000  |
| H | 0.48292400  | 3.24359200  | -0.08966000 |
| H | -0.95877000 | 2.94928100  | 0.90085500  |

### **3N (ba)**

|   |            |             |             |
|---|------------|-------------|-------------|
| C | 2.39598600 | -2.01695000 | 0.05929400  |
| C | 2.79010300 | -1.05761100 | -0.87575800 |
| C | 2.14184300 | 0.18443800  | -0.95134000 |
| C | 1.11514000 | 0.43884500  | -0.05617200 |
| C | 0.71328200 | -0.52896900 | 0.87540100  |

|   |             |             |             |
|---|-------------|-------------|-------------|
| C | 1.33611400  | -1.76566500 | 0.94367900  |
| C | 0.20096500  | 1.63247500  | 0.18457900  |
| C | -1.22907500 | 1.26858600  | -0.35841200 |
| C | -1.69404300 | 0.17381900  | 0.62556700  |
| C | -0.45200600 | 0.10922100  | 1.60210300  |
| O | -0.06627000 | 1.49764200  | 1.60913300  |
| O | -1.25110000 | 0.66562600  | -1.66322600 |
| N | -1.65246400 | -0.68109000 | -1.55482100 |
| C | -1.92131700 | -0.96578900 | -0.33201300 |
| C | -2.39931100 | -2.33211000 | 0.04563700  |
| H | 2.91837900  | -2.96873400 | 0.10480700  |
| H | 3.61251700  | -1.27456600 | -1.55197700 |
| H | 2.44801200  | 0.92121400  | -1.68894500 |
| H | 1.03069900  | -2.51856700 | 1.66640200  |
| H | -1.86101300 | 2.16141600  | -0.38504600 |
| H | -2.59056300 | 0.43196400  | 1.19867600  |
| H | -0.67092400 | -0.23125200 | 2.61428600  |
| H | -2.50998300 | -2.95392000 | -0.84594800 |
| H | -3.36564800 | -2.27900200 | 0.56343000  |
| H | -1.69102600 | -2.82133000 | 0.72645100  |
| C | 0.71335700  | 3.01188200  | -0.15491600 |
| H | -0.00002500 | 3.77493600  | 0.17334800  |
| H | 1.67444500  | 3.19884800  | 0.33321200  |
| H | 0.84511100  | 3.10745600  | -1.23809500 |

#### **4X (ba)**

|   |             |             |             |
|---|-------------|-------------|-------------|
| C | 3.75770700  | -0.46423200 | -0.48944300 |
| C | 3.51076200  | 0.89559600  | -0.68659100 |
| C | 2.25108300  | 1.44785400  | -0.40257500 |
| C | 1.27113300  | 0.60781200  | 0.10206000  |
| C | 1.52039400  | -0.75829000 | 0.30116400  |
| C | 2.75254100  | -1.31508300 | -0.00217400 |
| C | -0.19115100 | 0.80990000  | 0.50250900  |
| C | -1.04141300 | 0.15802400  | -0.67121500 |
| C | -0.75296900 | -1.35028400 | -0.44276600 |
| C | 0.19413500  | -1.31252900 | 0.78877600  |
| O | -0.33885000 | -0.19824400 | 1.52541100  |
| C | -2.54296300 | 0.16354600  | -0.50035700 |
| N | -3.03760100 | -0.97681700 | -0.18410100 |
| O | -2.02408400 | -1.94239900 | -0.10989600 |
| C | -0.59148200 | 2.17042800  | 1.02758900  |
| C | -3.45178500 | 1.32898300  | -0.74854500 |
| H | 4.74128000  | -0.86890200 | -0.71218000 |
| H | 4.30466100  | 1.53636400  | -1.06083800 |
| H | 2.06615100  | 2.50668300  | -0.56646200 |
| H | 2.94889900  | -2.37462200 | 0.14155300  |
| H | -0.73852200 | 0.55171700  | -1.64646500 |
| H | -0.33512900 | -1.89508700 | -1.29400300 |
| H | 0.19451800  | -2.21589000 | 1.39779200  |
| H | -1.59202200 | 2.13327300  | 1.46618600  |



|   |             |            |             |
|---|-------------|------------|-------------|
| H | -0.58551400 | 2.91807000 | 0.22686000  |
| H | 0.10975700  | 2.49030700 | 1.80426500  |
| H | -3.33011100 | 1.69915200 | -1.77522900 |
| H | -4.49154200 | 1.02285100 | -0.61000900 |
| H | -3.24168400 | 2.16859500 | -0.07748500 |

#### **4N (ba)**

|   |             |             |             |
|---|-------------|-------------|-------------|
| C | -3.11043000 | -0.67220200 | 0.42405600  |
| C | -2.75022300 | 0.33923000  | 1.31688200  |
| C | -1.55820800 | 1.05973700  | 1.14515200  |
| C | -0.76502700 | 0.75403300  | 0.04962700  |
| C | -1.13280000 | -0.25611600 | -0.85089700 |
| C | -2.29324700 | -0.99096300 | -0.67083100 |
| C | 0.57268900  | 1.27338600  | -0.46041700 |
| C | 1.66385300  | 0.14827900  | -0.19502300 |
| C | 1.25610200  | -0.92928800 | -1.22290900 |
| C | -0.01401700 | -0.28308100 | -1.87100200 |
| O | 0.40471500  | 1.09718100  | -1.89293400 |
| C | 1.58530000  | -0.65632200 | 1.07584300  |
| N | 1.21177100  | -1.87235700 | 0.90165100  |
| O | 1.01470700  | -2.12925100 | -0.46942300 |
| C | 0.97446800  | 2.69315200  | -0.13402100 |
| C | 1.88939400  | -0.14443200 | 2.44861800  |
| H | -4.03745800 | -1.21786900 | 0.57748000  |
| H | -3.40210000 | 0.57320900  | 2.15425300  |
| H | -1.28272400 | 1.84121300  | 1.84919900  |
| H | -2.57276000 | -1.78663700 | -1.35601800 |
| H | 2.65765400  | 0.57900100  | -0.36025900 |
| H | 2.01107400  | -1.14757500 | -1.98280600 |
| H | -0.25345600 | -0.62651800 | -2.87725700 |
| H | 0.19614700  | 3.39199500  | -0.45485500 |
| H | 1.12751400  | 2.81575900  | 0.94385700  |
| H | 1.90740900  | 2.95238400  | -0.64487800 |
| H | 2.90812800  | 0.26109000  | 2.49817400  |
| H | 1.79344700  | -0.94950700 | 3.18103000  |
| H | 1.20223400  | 0.66402500  | 2.72892400  |

#### **3X (bb)**

|   |             |             |             |
|---|-------------|-------------|-------------|
| C | -3.76265700 | 2.48462700  | -0.21581300 |
| C | -4.55576200 | 1.35540700  | -0.42749700 |
| C | -4.02742000 | 0.06396500  | -0.26919500 |
| C | -2.70506400 | -0.05513000 | 0.12849900  |
| C | -1.90834300 | 1.08106100  | 0.33761400  |
| C | -2.41520200 | 2.35805000  | 0.15882100  |
| C | -1.77996900 | -1.24310100 | 0.38025200  |
| C | -0.82151600 | -1.29685700 | -0.86091900 |
| C | 0.07537600  | -0.05357700 | -0.64164100 |
| C | -0.54081500 | 0.52040800  | 0.68801900  |
| O | -0.88539000 | -0.68723100 | 1.37846900  |
| O | 0.07215700  | -2.42964000 | -0.79793900 |

|   |             |             |             |
|---|-------------|-------------|-------------|
| N | 1.37197700  | -2.00434700 | -0.52789500 |
| C | 1.41937500  | -0.71875400 | -0.45959900 |
| H | -4.19422700 | 3.47431100  | -0.33877400 |
| H | -5.59690600 | 1.47698800  | -0.71397200 |
| H | -4.65067200 | -0.80967300 | -0.44266400 |
| H | -1.80166100 | 3.24199600  | 0.31503100  |
| H | -1.35523900 | -1.34806300 | -1.81295700 |
| H | 0.06790400  | 0.67723800  | -1.45474000 |
| H | 0.12713300  | 1.13212600  | 1.29411300  |
| C | 2.68701300  | -0.01735600 | -0.20883700 |
| C | 2.75584400  | 1.38342900  | -0.27775400 |
| C | 3.85756100  | -0.73619500 | 0.09936500  |
| C | 3.96019500  | 2.04979300  | -0.04808300 |
| H | 1.86749800  | 1.96001200  | -0.51946700 |
| C | 5.05516500  | -0.06848300 | 0.32810200  |
| H | 3.80757200  | -1.81837500 | 0.15649600  |
| C | 5.11327500  | 1.32760500  | 0.25617300  |
| H | 3.99421900  | 3.13431100  | -0.10797200 |
| H | 5.94954900  | -0.63787500 | 0.56653000  |
| H | 6.05094900  | 1.84574900  | 0.43765200  |
| C | -2.37343300 | -2.55417500 | 0.83696400  |
| H | -2.92871100 | -2.41231300 | 1.76874000  |
| H | -3.05844300 | -2.94914800 | 0.07850900  |
| H | -1.57865700 | -3.28617800 | 0.99766300  |

### **3N (bb)**

|   |             |             |             |
|---|-------------|-------------|-------------|
| C | 1.00157000  | 3.09667700  | -0.28683600 |
| C | 2.08497400  | 2.88876100  | 0.56990900  |
| C | 2.66480000  | 1.61843700  | 0.70336300  |
| C | 2.14733900  | 0.58425900  | -0.06045900 |
| C | 1.05731300  | 0.79331400  | -0.91656900 |
| C | 0.46183500  | 2.03955100  | -1.03440300 |
| C | 2.49020500  | -0.89195400 | -0.20142600 |
| C | 1.36334900  | -1.72126500 | 0.51819000  |
| C | 0.14022300  | -1.49689500 | -0.39430600 |
| C | 0.77429600  | -0.57183700 | -1.50816700 |
| O | 2.09626100  | -1.14123000 | -1.57950500 |
| O | 0.98269500  | -1.22913800 | 1.81708800  |
| N | -0.32026700 | -0.72576400 | 1.76868700  |
| C | -0.82329000 | -0.88244400 | 0.59027900  |
| H | 0.57065000  | 4.09029800  | -0.37545600 |
| H | 2.48486400  | 3.72268000  | 1.14042800  |
| H | 3.49811300  | 1.46121700  | 1.38275700  |
| H | -0.39226700 | 2.20265700  | -1.68631400 |
| H | 1.66996900  | -2.76528300 | 0.62955300  |
| H | -0.24201700 | -2.41184300 | -0.85615500 |
| H | 0.28898400  | -0.61339500 | -2.48314500 |
| C | -2.19930900 | -0.46244200 | 0.29014800  |
| C | -2.75143900 | -0.69239900 | -0.98000300 |
| C | -2.99112200 | 0.17119100  | 1.26660200  |

|   |             |             |             |
|---|-------------|-------------|-------------|
| C | -4.05961900 | -0.30211000 | -1.26977800 |
| H | -2.16097400 | -1.18609700 | -1.74667900 |
| C | -4.29337000 | 0.55926100  | 0.97364100  |
| H | -2.56686200 | 0.35191900  | 2.24855100  |
| C | -4.83475100 | 0.32509600  | -0.29532700 |
| H | -4.47055800 | -0.49070900 | -2.25793000 |
| H | -4.89208700 | 1.04802500  | 1.73764700  |
| H | -5.85319300 | 0.63031400  | -0.51960400 |
| C | 3.91155000  | -1.33212000 | 0.05678700  |
| H | 4.03235900  | -2.39323000 | -0.18491400 |
| H | 4.61140300  | -0.75311200 | -0.55293300 |
| H | 4.16452100  | -1.18862700 | 1.11285200  |

**4X (bb)**

|   |             |             |             |
|---|-------------|-------------|-------------|
| C | 4.05500800  | -1.99919900 | -0.46679700 |
| C | 4.77651700  | -0.81287800 | -0.61261100 |
| C | 4.18505900  | 0.42846900  | -0.32840700 |
| C | 2.87589200  | 0.43552900  | 0.12560000  |
| C | 2.14937700  | -0.75566200 | 0.27061900  |
| C | 2.71951800  | -1.98191800 | -0.03281600 |
| C | 1.88430300  | 1.52479200  | 0.49157900  |
| C | 0.88263800  | 1.63692000  | -0.68951700 |
| C | 0.07281000  | 0.32096300  | -0.55399600 |
| C | 0.75729200  | -0.32258100 | 0.73267000  |
| O | 1.07553900  | 0.87046400  | 1.48269600  |
| O | -0.06651600 | 2.70030300  | -0.45861200 |
| N | -1.34107800 | 2.17403000  | -0.27689400 |
| C | -1.31532600 | 0.88723200  | -0.34927400 |
| H | 4.53412400  | -2.94915300 | -0.68806900 |
| H | 5.80997000  | -0.85069300 | -0.94622100 |
| H | 4.74976200  | 1.34928700  | -0.45103800 |
| H | 2.16386500  | -2.91065800 | 0.07094500  |
| H | 2.26352100  | 2.47562400  | 0.86474500  |
| H | 1.36083700  | 1.81295400  | -1.65669600 |
| H | 0.13638500  | -0.34538200 | -1.41784300 |
| C | -2.56787800 | 0.11677400  | -0.26431500 |
| C | -2.63213300 | -1.20994200 | -0.71992900 |
| C | -3.73630900 | 0.70976700  | 0.24976200  |
| C | -3.82864600 | -1.92518800 | -0.66513700 |
| H | -1.74661900 | -1.68603300 | -1.13084700 |
| C | -4.92701600 | -0.00700200 | 0.30387500  |
| H | -3.69110900 | 1.73430400  | 0.60361000  |
| C | -4.97981700 | -1.32808800 | -0.15211000 |
| H | -3.85894600 | -2.94978000 | -1.02608300 |
| H | -5.81890400 | 0.46501800  | 0.70728400  |
| H | -5.91108100 | -1.88595300 | -0.10564800 |
| C | -0.03521500 | -1.29055800 | 1.58145200  |
| H | -0.96418500 | -0.83305600 | 1.92984900  |
| H | -0.28862200 | -2.19280700 | 1.01566800  |
| H | 0.55992700  | -1.58259000 | 2.45204400  |

**4N (bb)**

|   |             |             |             |
|---|-------------|-------------|-------------|
| C | 1.50849200  | 2.73595200  | -1.04214900 |
| C | 2.55047200  | 2.73128700  | -0.11202100 |
| C | 3.00774400  | 1.53050100  | 0.45027400  |
| C | 2.41205000  | 0.35106700  | 0.03342700  |
| C | 1.36368800  | 0.35434700  | -0.89722600 |
| C | 0.88935600  | 1.54043800  | -1.43685900 |
| C | 2.59952000  | -1.10837400 | 0.38922400  |
| C | 1.40490200  | -1.56872700 | 1.28877300  |
| C | 0.22830600  | -1.55640100 | 0.28796600  |
| C | 0.96166800  | -1.10633100 | -1.05229000 |
| O | 2.23982000  | -1.76649900 | -0.84092500 |
| O | 1.04770700  | -0.64581900 | 2.33463200  |
| N | -0.20306600 | -0.08679800 | 2.06257300  |
| C | -0.69496700 | -0.57944000 | 0.97553700  |
| H | 1.17230200  | 3.67830700  | -1.46625500 |
| H | 3.01382600  | 3.67012400  | 0.17895400  |
| H | 3.80900400  | 1.53307800  | 1.18427800  |
| H | 0.06859800  | 1.55483700  | -2.14903100 |
| H | 3.58679000  | -1.42871000 | 0.72171900  |
| H | 1.60784200  | -2.54008300 | 1.74669200  |
| H | -0.22332500 | -2.54038100 | 0.12828300  |
| C | -2.02570400 | -0.16002300 | 0.50649600  |
| C | -2.72030300 | -0.91353200 | -0.45327600 |
| C | -2.63520500 | 0.99707800  | 1.02667800  |
| C | -3.98963100 | -0.52348700 | -0.88274900 |
| H | -2.27673100 | -1.81877100 | -0.85662300 |
| C | -3.90019200 | 1.38228800  | 0.59623100  |
| H | -2.09912000 | 1.58329700  | 1.76542600  |
| C | -4.58345500 | 0.62548600  | -0.36150000 |
| H | -4.51372400 | -1.12188700 | -1.62315400 |
| H | -4.35573300 | 2.28007000  | 1.00553000  |
| H | -5.57039300 | 0.93149000  | -0.69766700 |
| C | 0.34444900  | -1.54806100 | -2.35888100 |
| H | 1.01565800  | -1.30773900 | -3.18887300 |
| H | 0.17068600  | -2.62941800 | -2.35611000 |
| H | -0.61155400 | -1.04248500 | -2.52675500 |

**3X (ca)**

|   |             |             |             |
|---|-------------|-------------|-------------|
| C | -3.48633900 | -2.19725100 | 0.08508800  |
| C | -3.68854600 | -0.94026800 | 0.65628700  |
| C | -2.65775200 | 0.01300700  | 0.68589000  |
| C | -1.43988800 | -0.31419500 | 0.10692900  |
| C | -1.23823600 | -1.58654900 | -0.45554300 |
| C | -2.24194000 | -2.54128900 | -0.46664400 |
| C | -0.09601300 | 0.40714300  | -0.02431500 |
| C | 0.81341500  | -0.27919100 | 1.05371700  |
| C | 1.07535700  | -1.67796400 | 0.43310000  |
| C | 0.21880500  | -1.58575800 | -0.87891700 |

|    |             |             |             |
|----|-------------|-------------|-------------|
| O  | 0.42066900  | -0.21598600 | -1.24543900 |
| O  | 2.11532100  | 0.33772800  | 1.16324100  |
| N  | 3.09681200  | -0.49685900 | 0.59803800  |
| C  | 2.56474700  | -1.59693700 | 0.21246000  |
| C  | 3.39725600  | -2.67523900 | -0.40580200 |
| H  | -4.29982500 | -2.91748300 | 0.06690900  |
| H  | -4.65795000 | -0.69308800 | 1.08068100  |
| H  | -2.82660900 | 0.98289900  | 1.14633700  |
| H  | -2.08329000 | -3.52825800 | -0.89462100 |
| H  | 0.36400400  | -0.27417900 | 2.04927400  |
| H  | 0.79013200  | -2.53400200 | 1.05280900  |
| H  | 0.51564400  | -2.25115600 | -1.69100500 |
| H  | 4.44789700  | -2.37609500 | -0.42631600 |
| H  | 3.07430100  | -2.88398300 | -1.43387400 |
| H  | 3.30677500  | -3.61217600 | 0.15888700  |
| Si | -0.01038900 | 2.32484000  | -0.21289100 |
| C  | 1.62248400  | 2.78093300  | -1.03524700 |
| H  | 1.68626900  | 3.86295800  | -1.20499200 |
| H  | 2.46974800  | 2.47368500  | -0.41581600 |
| H  | 1.71698600  | 2.27919500  | -2.00428100 |
| C  | -0.15079800 | 3.09759700  | 1.51030300  |
| H  | 0.67885600  | 2.77691500  | 2.15045600  |
| H  | -0.11446600 | 4.19192100  | 1.44374900  |
| H  | -1.08868600 | 2.83215200  | 2.01310000  |
| C  | -1.45201500 | 2.87191800  | -1.31012500 |
| H  | -2.42881500 | 2.65132600  | -0.86605200 |
| H  | -1.40507400 | 3.95245000  | -1.49415500 |
| H  | -1.40928000 | 2.36749700  | -2.28237600 |

### **3N (ca)**

|   |             |             |             |
|---|-------------|-------------|-------------|
| C | -2.25676400 | 2.83324600  | -0.03311100 |
| C | -1.21120200 | 2.95915400  | 0.88265800  |
| C | -0.17105800 | 2.01823800  | 0.92524100  |
| C | -0.19261900 | 0.96988700  | 0.01673600  |
| C | -1.25695800 | 0.83761600  | -0.89031500 |
| C | -2.29760700 | 1.75230300  | -0.92658400 |
| C | 0.72970400  | -0.21467900 | -0.25773100 |
| C | 0.01549400  | -1.50554600 | 0.30175600  |
| C | -1.19453100 | -1.66387400 | -0.64788300 |
| C | -0.96785900 | -0.44883700 | -1.63004700 |
| O | 0.47214000  | -0.43609600 | -1.68507500 |
| O | -0.53307400 | -1.37160400 | 1.62438200  |
| N | -1.94019400 | -1.40766900 | 1.55906100  |
| C | -2.32244500 | -1.58914400 | 0.34674100  |
| C | -3.77715500 | -1.69155300 | 0.01273600  |
| H | -3.04685200 | 3.57897300  | -0.05433800 |
| H | -1.19993500 | 3.79923400  | 1.57186000  |
| H | 0.62623500  | 2.12077000  | 1.65562200  |
| H | -3.12044400 | 1.64945900  | -1.63018000 |
| H | 0.69431900  | -2.36252000 | 0.30515700  |

|    |             |             |             |
|----|-------------|-------------|-------------|
| H  | -1.19646700 | -2.59623900 | -1.22214600 |
| H  | -1.38797800 | -0.57017100 | -2.62907400 |
| H  | -4.37929300 | -1.63785600 | 0.92285500  |
| H  | -3.99441900 | -2.63648800 | -0.50172600 |
| H  | -4.08338600 | -0.87788100 | -0.65707000 |
| C  | 3.42992900  | -1.59526100 | -0.73663400 |
| H  | 4.52319300  | -1.51805800 | -0.69372800 |
| H  | 3.14725300  | -2.51516900 | -0.21116400 |
| H  | 3.14063500  | -1.70675400 | -1.78731700 |
| C  | 2.96097800  | 0.00089300  | 1.88431200  |
| H  | 2.43653700  | -0.80172000 | 2.41562500  |
| H  | 4.03394800  | -0.11138300 | 2.08335700  |
| H  | 2.64339600  | 0.95047800  | 2.32999500  |
| C  | 3.24392300  | 1.49728800  | -0.84211800 |
| H  | 2.77195900  | 2.39927800  | -0.43679300 |
| H  | 4.32931800  | 1.60592500  | -0.72725000 |
| H  | 3.02061100  | 1.45950800  | -1.91421000 |
| Si | 2.62280100  | -0.06232000 | 0.02272100  |

#### **4X (ca)**

|   |             |             |             |
|---|-------------|-------------|-------------|
| C | -4.13500700 | -0.23143400 | 0.38729300  |
| C | -3.56652400 | 0.83930300  | 1.07834300  |
| C | -2.18686100 | 1.09193300  | 1.00853700  |
| C | -1.40483100 | 0.26831700  | 0.21111400  |
| C | -1.98050700 | -0.81426100 | -0.47392000 |
| C | -3.33644800 | -1.08676400 | -0.38795800 |
| C | 0.10064600  | 0.19243400  | -0.08965200 |
| C | 0.59699300  | -1.03978000 | 0.79524400  |
| C | -0.04381600 | -2.23399200 | 0.02809100  |
| C | -0.80496200 | -1.52035700 | -1.11834300 |
| O | 0.07936700  | -0.42627000 | -1.40865500 |
| C | 2.05167300  | -1.44415400 | 0.71852500  |
| N | 2.26918500  | -2.49372600 | 0.01346500  |
| O | 1.06163600  | -3.00540500 | -0.48067900 |
| C | 3.18198000  | -0.81622500 | 1.47617700  |
| H | -5.20559900 | -0.40596100 | 0.45115200  |
| H | -4.19923300 | 1.48925300  | 1.67691300  |
| H | -1.75846700 | 1.92067900  | 1.56629500  |
| H | -3.77887100 | -1.93252300 | -0.90849600 |
| H | 0.26612600  | -0.92834200 | 1.83210400  |
| H | -0.68014500 | -2.89525700 | 0.62362700  |
| H | -0.97715300 | -2.12780200 | -2.00660800 |
| H | 3.32466800  | 0.23788900  | 1.22054800  |
| H | 2.98769200  | -0.86279600 | 2.55622000  |
| H | 4.10987100  | -1.35491100 | 1.26825900  |
| C | 2.59523500  | 1.59858300  | -1.32270700 |
| H | 3.31226400  | 0.90959000  | -0.86744000 |
| H | 2.32391300  | 1.18593300  | -2.30031700 |
| H | 3.10786600  | 2.55394900  | -1.49097000 |
| C | 1.41641200  | 2.62844800  | 1.39928500  |

|    |             |            |             |
|----|-------------|------------|-------------|
| H  | 1.95805400  | 3.57402100 | 1.27152200  |
| H  | 0.50040900  | 2.85463200 | 1.95825000  |
| H  | 2.03454800  | 1.97960100 | 2.02886700  |
| C  | -0.11105100 | 3.02545100 | -1.26035200 |
| H  | 0.40879400  | 3.95944200 | -1.50740700 |
| H  | -0.42298300 | 2.55715200 | -2.20051800 |
| H  | -1.01695600 | 3.28281400 | -0.70173100 |
| Si | 1.03252100  | 1.86907800 | -0.29627900 |

#### **4N (ca)**

|    |             |             |             |
|----|-------------|-------------|-------------|
| C  | -2.89970900 | 2.30549000  | 0.36589400  |
| C  | -1.90199700 | 2.40585200  | 1.33657300  |
| C  | -0.70461500 | 1.68360100  | 1.21656300  |
| C  | -0.52561000 | 0.88679400  | 0.09378800  |
| C  | -1.53253600 | 0.79223700  | -0.88137800 |
| C  | -2.72820600 | 1.47958600  | -0.75480700 |
| C  | 0.58609100  | -0.04712600 | -0.37670600 |
| C  | 0.04690500  | -1.53984700 | -0.19567000 |
| C  | -1.02867300 | -1.62406900 | -1.30583700 |
| C  | -0.99040800 | -0.18098000 | -1.90349400 |
| O  | 0.42756500  | 0.06819500  | -1.83168700 |
| C  | -0.79767500 | -1.87236600 | 1.00802700  |
| N  | -2.03549700 | -2.08178100 | 0.73808000  |
| O  | -2.25640600 | -1.97696000 | -0.64859100 |
| C  | -0.31124900 | -1.96945300 | 2.41965600  |
| H  | -3.81922200 | 2.87318000  | 0.47922800  |
| H  | -2.05242200 | 3.05262500  | 2.19684200  |
| H  | 0.05684900  | 1.76135100  | 1.98818400  |
| H  | -3.51435200 | 1.38884600  | -1.49952900 |
| H  | 0.87194900  | -2.24704300 | -0.33015100 |
| H  | -0.82739800 | -2.36950900 | -2.07984200 |
| H  | -1.34479900 | -0.08871600 | -2.93049200 |
| H  | 0.49879700  | -2.70559400 | 2.50435600  |
| H  | -1.12955200 | -2.26979900 | 3.07847200  |
| H  | 0.08434700  | -1.00805600 | 2.76832200  |
| Si | 2.43196700  | 0.34294400  | -0.00855800 |
| C  | 3.47221300  | -0.87678300 | -1.01121500 |
| H  | 4.53696900  | -0.62059200 | -0.95204800 |
| H  | 3.36420100  | -1.90740800 | -0.65240800 |
| H  | 3.17795800  | -0.85632500 | -2.06604000 |
| C  | 2.82233200  | 0.15048500  | 1.83589000  |
| H  | 3.88456400  | 0.36331500  | 2.01092100  |
| H  | 2.24726200  | 0.84327000  | 2.46102400  |
| H  | 2.63150400  | -0.86597900 | 2.19861600  |
| C  | 2.76832200  | 2.11452500  | -0.56702100 |
| H  | 3.82491800  | 2.37652700  | -0.43345600 |
| H  | 2.51960400  | 2.23651900  | -1.62674300 |
| H  | 2.16935900  | 2.83708400  | -0.00135600 |

#### **3X (da)**

|   |             |             |             |
|---|-------------|-------------|-------------|
| C | 3.54607200  | -1.65383600 | -0.03632200 |
| C | 3.73302200  | -0.35587800 | -0.51746700 |
| C | 2.67952700  | 0.57158500  | -0.52926800 |
| C | 1.45816100  | 0.16229200  | -0.01718600 |
| C | 1.26609400  | -1.14239200 | 0.46043100  |
| C | 2.29606000  | -2.06970500 | 0.44830000  |
| C | 0.09331800  | 0.82669200  | 0.12355200  |
| C | -0.80178800 | 0.21761300  | -1.01919200 |
| C | -1.02795700 | -1.22543200 | -0.50056200 |
| C | -0.20295200 | -1.19784000 | 0.83878800  |
| O | -0.44626000 | 0.14817800  | 1.28082400  |
| O | -2.10912300 | 0.82244600  | -1.05543100 |
| N | -3.07648000 | -0.08517600 | -0.58245200 |
| C | -2.52241500 | -1.20483900 | -0.29904300 |
| C | -3.33232700 | -2.35864400 | 0.20171800  |
| H | 4.37915300  | -2.35152900 | -0.03620800 |
| H | 4.71001900  | -0.05798800 | -0.88818600 |
| H | 2.81250100  | 1.57702000  | -0.91360100 |
| H | 2.15399000  | -3.08475600 | 0.81080600  |
| H | -0.34765600 | 0.32693500  | -2.00541500 |
| H | -0.70147400 | -2.02778300 | -1.16876500 |
| H | -0.50981800 | -1.91195400 | 1.60352100  |
| H | -4.38916900 | -2.08570200 | 0.24712200  |
| H | -3.00780100 | -2.66539700 | 1.20434600  |
| H | -3.21993700 | -3.22996200 | -0.45614400 |
| C | 0.03234500  | 2.34382000  | 0.22514400  |
| O | 0.70948100  | 3.00617500  | -0.53998800 |
| C | -0.90658300 | 2.93595500  | 1.24263100  |
| H | -0.82381600 | 4.02438000  | 1.22829900  |
| H | -1.93034300 | 2.62899400  | 0.99781800  |
| H | -0.68652500 | 2.54322700  | 2.24119900  |

### **3N (da)**

|   |             |             |             |
|---|-------------|-------------|-------------|
| C | 1.80093000  | 2.81398900  | 0.22553600  |
| C | 0.78112500  | 3.01152200  | -0.70877600 |
| C | -0.26961000 | 2.09192000  | -0.84004000 |
| C | -0.27284200 | 0.99699900  | 0.00911800  |
| C | 0.75705800  | 0.78620100  | 0.93655000  |
| C | 1.80834400  | 1.68295700  | 1.05520500  |
| C | -1.20328900 | -0.19072200 | 0.18927100  |
| C | -0.50393600 | -1.46632300 | -0.44307800 |
| C | 0.65996300  | -1.70383300 | 0.54598600  |
| C | 0.42321400  | -0.53918200 | 1.58774600  |
| O | -1.02045400 | -0.50727300 | 1.59125100  |
| O | 0.09658000  | -1.26306000 | -1.72499200 |
| N | 1.50032500  | -1.33256700 | -1.60691300 |
| C | 1.83033700  | -1.59631900 | -0.39495900 |
| C | 3.26729900  | -1.74955500 | -0.00875000 |
| H | 2.59975000  | 3.54570300  | 0.31085300  |
| H | 0.80112500  | 3.89269700  | -1.34413600 |



|   |             |             |             |
|---|-------------|-------------|-------------|
| H | -1.05817900 | 2.22981400  | -1.57127400 |
| H | 2.61001300  | 1.53016500  | 1.77371600  |
| H | -1.21548800 | -2.29290200 | -0.52298400 |
| H | 0.61681100  | -2.66625200 | 1.06585900  |
| H | 0.79994400  | -0.72694400 | 2.59311100  |
| H | 3.90690000  | -1.65493900 | -0.88936900 |
| H | 3.44501300  | -2.72777500 | 0.45600000  |
| H | 3.56128600  | -0.98344900 | 0.71997900  |
| C | -2.66645800 | -0.02144100 | -0.18348900 |
| O | -2.95766200 | 0.50740700  | -1.23961100 |
| C | -3.69551300 | -0.55692800 | 0.78543000  |
| H | -3.50983200 | -1.61554900 | 1.00273700  |
| H | -3.61299400 | -0.02812500 | 1.74189100  |
| H | -4.69406300 | -0.42677900 | 0.36432600  |

#### **4X (da)**

|   |             |             |             |
|---|-------------|-------------|-------------|
| C | 3.92576700  | -0.47996300 | -0.34016600 |
| C | 3.55759800  | 0.76875500  | -0.84638700 |
| C | 2.23718800  | 1.23289200  | -0.73605000 |
| C | 1.32617000  | 0.42064300  | -0.08142500 |
| C | 1.68937400  | -0.83498500 | 0.42587300  |
| C | 2.98522300  | -1.30876000 | 0.29179100  |
| C | -0.17102100 | 0.53628800  | 0.21623200  |
| C | -0.89816600 | -0.42191600 | -0.81911100 |
| C | -0.47215100 | -1.80764200 | -0.26499800 |
| C | 0.39619900  | -1.41495700 | 0.96670900  |
| O | -0.28556300 | -0.22947600 | 1.42715700  |
| C | -2.39774400 | -0.52756100 | -0.66728000 |
| N | -2.79151300 | -1.62483100 | -0.13298500 |
| O | -1.69282100 | -2.45446000 | 0.14034700  |
| C | -3.39230200 | 0.49524600  | -1.12296900 |
| H | 4.95480300  | -0.81524600 | -0.43655600 |
| H | 4.30387500  | 1.39133600  | -1.33222900 |
| H | 1.94187800  | 2.19527200  | -1.14298800 |
| H | 3.27589200  | -2.28526300 | 0.67050800  |
| H | -0.59376700 | -0.19388200 | -1.84299900 |
| H | 0.04845500  | -2.46586100 | -0.96540300 |
| H | 0.44118300  | -2.16405200 | 1.75611500  |
| H | -3.28226800 | 0.68458500  | -2.19826100 |
| H | -4.40676700 | 0.13930800  | -0.92853000 |
| H | -3.25034200 | 1.45791600  | -0.62026700 |
| C | -0.70265800 | 1.95223800  | 0.34502800  |
| O | -0.70720000 | 2.66626500  | -0.64298500 |
| C | -1.17507300 | 2.40278900  | 1.70469500  |
| H | -1.52119500 | 3.43662000  | 1.65012300  |
| H | -1.97672500 | 1.74553200  | 2.06150100  |
| H | -0.36017700 | 2.31051800  | 2.43208600  |

#### **4N (da)**

|   |            |             |            |
|---|------------|-------------|------------|
| C | 2.94762300 | -1.66519200 | 0.52381000 |
|---|------------|-------------|------------|

|   |             |             |             |
|---|-------------|-------------|-------------|
| C | 1.99458600  | -1.92997500 | 1.51038400  |
| C | 0.65929700  | -1.53116000 | 1.34981500  |
| C | 0.31901300  | -0.89308100 | 0.16761300  |
| C | 1.27079800  | -0.63111300 | -0.82708100 |
| C | 2.59674100  | -0.99601100 | -0.65782000 |
| C | -0.97659900 | -0.29933800 | -0.37672600 |
| C | -0.86670700 | 1.28699700  | -0.31743300 |
| C | 0.17708700  | 1.54602300  | -1.42628900 |
| C | 0.50595300  | 0.09321600  | -1.91356800 |
| O | -0.80789900 | -0.50201500 | -1.79835400 |
| C | -0.17352300 | 1.91672500  | 0.86179600  |
| N | 0.98542900  | 2.39412700  | 0.58416900  |
| O | 1.26669100  | 2.22928800  | -0.79072700 |
| C | -0.73759200 | 2.00852300  | 2.24369600  |
| H | 3.97596100  | -1.98226500 | 0.67368300  |
| H | 2.29098900  | -2.45238900 | 2.41579600  |
| H | -0.08044900 | -1.72334000 | 2.12119900  |
| H | 3.34568000  | -0.77876400 | -1.41431300 |
| H | -1.85348900 | 1.71940900  | -0.51036800 |
| H | -0.18251200 | 2.16121000  | -2.25554400 |
| H | 0.87109600  | 0.01109800  | -2.93684000 |
| H | -1.63756800 | 2.63764600  | 2.24754000  |
| H | -0.00226300 | 2.44273500  | 2.92499000  |
| H | -1.04279600 | 1.02047700  | 2.60217100  |
| C | -2.26277700 | -0.89411200 | 0.16350000  |
| O | -2.55568800 | -0.69816000 | 1.33079700  |
| C | -3.10514800 | -1.72274000 | -0.77437800 |
| H | -3.99578200 | -2.07659600 | -0.25189000 |
| H | -3.38433300 | -1.13258900 | -1.65474300 |
| H | -2.51988700 | -2.57100300 | -1.14850800 |

**Cartesian coordinates for TSXA (da) and TSXS (da) at M05-2X/ 6-311++g(2d,2p) level**

**TSXA (da)**

|   |             |             |             |
|---|-------------|-------------|-------------|
| C | 3.68654100  | -1.57596300 | 0.02793400  |
| C | 3.86871400  | -0.25230500 | -0.32830100 |
| C | 2.78844700  | 0.63847000  | -0.37530200 |
| C | 1.55401900  | 0.14646200  | -0.04273000 |
| C | 1.36345600  | -1.18937200 | 0.31205800  |
| C | 2.41522000  | -2.06771900 | 0.35189300  |
| C | 0.14466200  | 0.75015800  | 0.01146800  |
| C | -0.60467000 | 0.13899500  | -1.17325100 |
| C | -0.82671500 | -1.15537900 | -0.82754900 |
| C | -0.14239700 | -1.30695500 | 0.54693600  |
| O | -0.41184900 | -0.00821600 | 1.10071000  |
| O | -2.64758700 | 1.11224500  | -0.67674200 |
| N | -3.15079000 | 0.05808800  | -0.31378900 |
| C | -2.97794000 | -1.09950600 | -0.15883400 |

|   |             |             |             |
|---|-------------|-------------|-------------|
| C | -3.50738400 | -2.39678100 | 0.27758400  |
| H | 4.53544500  | -2.23949500 | 0.05851400  |
| H | 4.85733800  | 0.10040400  | -0.57301200 |
| H | 2.92075300  | 1.66857500  | -0.66277900 |
| H | 2.28245400  | -3.10210100 | 0.62705900  |
| H | -0.65002000 | 0.60295700  | -2.13910100 |
| H | -0.99103500 | -1.96849700 | -1.51296600 |
| H | -0.48235500 | -2.09333100 | 1.20521200  |
| H | -4.55803000 | -2.29591900 | 0.53027600  |
| H | -2.96577100 | -2.74673600 | 1.15094300  |
| H | -3.40065600 | -3.12847400 | -0.51683400 |
| C | 0.05113100  | 2.24223600  | 0.17171200  |
| O | 0.54263100  | 2.93393800  | -0.68681600 |
| C | -0.63602400 | 2.77064900  | 1.38822600  |
| H | -0.59818100 | 3.85244300  | 1.38032300  |
| H | -1.66342900 | 2.41504000  | 1.38244700  |
| H | -0.15891200 | 2.36683600  | 2.27817300  |

### **TSXS (da)**

|   |             |             |             |
|---|-------------|-------------|-------------|
| C | 4.05321600  | -0.47552400 | -0.21194600 |
| C | 3.72708400  | 0.81392500  | -0.58870200 |
| C | 2.40112700  | 1.26490500  | -0.53917800 |
| C | 1.45333700  | 0.38251700  | -0.09419100 |
| C | 1.77558700  | -0.92146600 | 0.28670100  |
| C | 3.06944700  | -1.37091900 | 0.22919900  |
| C | -0.07066600 | 0.45233100  | 0.08327400  |
| C | -0.68407400 | -0.42769200 | -1.02060700 |
| C | -0.33967600 | -1.69221000 | -0.65922700 |
| C | 0.43135900  | -1.55317000 | 0.65382600  |
| O | -0.22832600 | -0.40362700 | 1.22167400  |
| C | -2.86762500 | -0.34998900 | -0.44536700 |
| N | -2.90895100 | -1.43402500 | 0.02669000  |
| O | -2.27524000 | -2.45103900 | 0.26366700  |
| C | -3.60091800 | 0.87714400  | -0.79495600 |
| H | 5.08088700  | -0.79747800 | -0.25646100 |
| H | 4.50301800  | 1.48224700  | -0.92461000 |
| H | 2.14104700  | 2.26635500  | -0.84353600 |
| H | 3.33380200  | -2.37591800 | 0.51720100  |
| H | -0.88032300 | -0.06540900 | -2.01343900 |
| H | -0.31862000 | -2.56815400 | -1.27827100 |
| H | 0.42177800  | -2.39015700 | 1.33373000  |
| H | -4.63071000 | 0.63005200  | -1.03269800 |
| H | -3.57966100 | 1.58459500  | 0.02830500  |
| H | -3.13194500 | 1.34707600  | -1.65204300 |
| C | -0.62964000 | 1.82976000  | 0.28840500  |
| O | -0.80017200 | 2.54349000  | -0.67213300 |
| C | -0.91928100 | 2.24489300  | 1.69625600  |
| H | -0.01511600 | 2.14030200  | 2.29231400  |
| H | -1.27891200 | 3.26591200  | 1.70921800  |
| H | -1.64835000 | 1.56112300  | 2.12687300  |
